# Human innate lymphoid cell activation by adenoviruses is modified by host defence proteins and neutralizing antibodies

Océane Paris, Franck JD Mennechet<sup>\*#a</sup>, EJ Kremer<sup>\*°</sup>

Institut de Génétique Moléculaire de Montpellier, Université de Montpellier, CNRS,  
Montpellier, France

\*Co-senior authors

°Correspondence to: [eric.kremer@igmm.cnrs.fr](mailto:eric.kremer@igmm.cnrs.fr) (EJK)

#aCurrent address: Pathogenesis and Control of Chronic Infections, INSERM, Université de Montpellier, Montpellier, France

**Keywords:** ILCs, adenoviruses, dendritic cells, epithelial cells, innate immunity, vaccination, inflammation, antiviral response

## 1 **Abstract**

2 Innate lymphoid cells (ILCs), the complements of diverse CD4 T helper cells, help maintain  
3 tissue homeostasis by providing a link between innate and adaptive immune responses.  
4 While pioneering studies over the last decade have advanced our understanding how ILCs  
5 influence adaptive immune responses to pathogens, far less is known about whether the  
6 adaptive immune response feeds back into an ILC response. In this study, we isolated ILCs  
7 from blood of healthy donors, fine-tuned culture conditions, and then directly challenged  
8 them with human adenoviruses (HAdVs), with HAdVs and host defence proteins (HDPs) or  
9 neutralizing antibodies (NAbs), to mimic interactions in a host with pre-existing immunity.  
10 Additionally, we developed an *ex vivo* approach to identify how bystander ILCs respond to  
11 the uptake of HAdVs  $\pm$  neutralizing antibodies by monocyte-derived dendritic cells. We  
12 show that ILCs take up HAdVs, which induces phenotypic maturation and cytokine  
13 secretion. Moreover, NAbs and HDPs complexes modified the cytokine profile generated  
14 by ILCs, consistent with a feedback loop for host antiviral responses and potential to impact  
15 adenovirus-based vaccine efficacy.

## 16 **Author Summary**

17 Several studies have shown the importance of innate lymphoid cells (ILCs) both from an  
18 immune and physiological point of view, in particular for their role in the maintenance of  
19 tissue integrity, pathogens clearance, or in the establishment of immune tolerance. Our  
20 study focuses on the role of ILCs during direct challenge with prototype vaccines based on  
21 human adenoviruses (HAdVs)  $\pm$  host defence proteins (HDPs) or neutralizing antibodies  
22 (NAbs) to mimic interactions in a host with pre-existing immunity. In parallel, through an ex  
23 vivo approach we observe how bystander ILCs respond to the uptake of HAdVs  $\pm$  NAbs by  
24 monocyte-derived dendritic cells. We show that ILCs take up HAdVs, which induces pro-  
25 inflammatory and antiviral responses through phenotypic maturation and cytokine  
26 secretion. Moreover, HAdV-NAb and HAdV-HDP complexes modified the cytokine profile  
27 generated by ILCs, consistent with a feedback loop for host antiviral responses and  
28 potential to impact HAdV vaccine efficacy.

## 29 Introduction

30 Innate lymphoid cells (ILCs) are functional kin to CD4 T helper (Th) cells. In contrast to Th  
31 cells, ILCs traffic through the lymphatic and vascular systems to preferentially reside in  
32 mucosal compartments where they help maintain a balance between anti-pathogen  
33 immunity and tolerance [1–3]. Unlike T and B cells, ILCs do not express rearranged antigen-  
34 specific receptors [1]. ILC interactions with neighbouring cells are crucial events in the  
35 induction and development of immune responses [4,5]. In synergy with myeloid cells,  
36 respond to pathogens through the secretion of cytokines [6,7]. Like Th cells, ILCs can be  
37 functionally and phenotypically subdivided into subsets: ILC1 (which historically included  
38 cytotoxic NK cells), ILC2, and ILC3. NK cells appear to be counterparts of CD8<sup>+</sup> T cells,  
39 while ILC1, ILC2, ILC3 the counterparts of Th1, Th2, Th17/22 CD4<sup>+</sup> T cells, respectively  
40 [8,9]. LTi (lymphoid tissue-inducer) cells belong the ILC3 family and are involved in  
41 embryonic lymph node formation. Yet, ILC subsets are not static and show context-specific  
42 heterogeneity and plasticity, particularly as we age and during the development of antiviral  
43 responses [10,11].

44 By the time we are adolescents, we have been infected with several human adenovirus  
45 (HAdV) types [12,13]. The archetypal robust and long-lived immune response against  
46 HAdVs is due, in part, to latent infections that persist for years and constantly re-stimulate  
47 the memory B and T cell responses [14–16]. HAdV are nonenveloped particles with a linear  
48 double-stranded DNA genome of ~36 kilobase pairs. The more than 110 HAdV types are  
49 grouped into 7 species (A to G) [17]. The variable tropism of HAdVs typically causes mild,  
50 self-limiting symptoms within 10 days post-infection [18,19]. Globally, HAdVs of species A  
51 and C mainly induce pathology in the respiratory, urinary and gastrointestinal tracts.  
52 Species B HAdVs infections have the broadest tissue diversity and can cause disease in  
53 the respiratory, urinary, gastrointestinal and conjunctiva [17,18]. The species D HAdVs  
54 typically cause disease in the conjunctiva and gastrointestinal tracts, while those of species

55 E affect the respiratory tract and conjunctiva. For HAdVs of species F and potentially G,  
56 symptoms are preferentially in the intestinal compartments [17].

57 In the era of COVID-19, HAdV-based vaccine efficacy and safety are of particular relevance  
58 [20–22]. The roles ILCs play against HAdVs and HAdV-based vaccines are unknown.  
59 Moreover, whether the responses by ILCs are affected by pre-existing HAdV immunity has  
60 not been addressed. To fill this gap, we evaluated the interactions between human ILCs  
61 and three HAdV types that are used as vaccines: HAdV species C type 5 (-C5), species D  
62 type 26 (-D26), and species B type 35 (-B35) [5,23,24]. These three HAdVs have different  
63 seroprevalence profiles and differ in the mechanism by which they are taken up by cells.

64 In this study, we initially tweaked a protocol for the culturing of ILCs from human blood.  
65 Then, we quantified ILC uptake of HAdV-C5, -D26, and -B35 alone, or in complex with host  
66 defence proteins (HDPs), or neutralizing antibodies (NAbs) [25–28]. We characterized the  
67 levels of potential HAdV receptors, receptors for HDP- and NAb-complexed HAdVs, and  
68 relevant pattern recognition receptors (PRRs). Finally, as ILCs cooperate with neighbouring  
69 antigen-presenting cells [6,29,30], we developed an *ex vivo* environment to mimic this  
70 interplay. We show that HAdVs complexed with HDPs or NAbs induced differential cell  
71 surface levels of activation markers, and production of pro-inflammatory and antiviral  
72 cytokines with activities comparable to that of Th cells [31]. As bystanders, the ILC response  
73 to monocyte-derived dendritic cells (moDCs) that are challenged with HAdVs  $\pm$  NAbs, can  
74 be HAdV-type dependent. These data demonstrate that pre-existing B cell immunity against  
75 HAdVs and HDPs directly impact ILC responses, which likely influence vaccine efficacy.

## 76 Results

### 77 ILC purity and stability

78 ILCs were obtained by negative immunomagnetic selection from anonymous blood bank  
79 donor PBMCs. To evaluate ILC recovery and purity, we used multi-parameter flow  
80 cytometry and a combination of markers including Lin<sup>-</sup>, CD127<sup>+</sup>, CRTH2<sup>+/-</sup> and CD117<sup>+/-</sup>.  
81 After enrichment, the cells were characterized according to their size and granularity.  
82 Approximately 50% of the cells had a lymphoid profile (**Fig 1A**). Within the lymphoid  
83 population, approximately 3% were CD3<sup>+</sup> (**Fig 1B**), and approximately 60% were CD3<sup>-</sup>  
84 /CD127<sup>+/-</sup> of which 22% were CD127<sup>high</sup> (**Fig 1C**). In this donor, 28% of the cells were ILC1  
85 (CRTH2<sup>-</sup>/CD117<sup>-</sup>), 16% were ILC2 (CRTH2<sup>+</sup>/CD117<sup>+/-</sup>), and 56% were ILC3 (CRTH2<sup>-</sup>  
86 CD117<sup>+</sup>) (**Fig 1D**). Cumulative data from >60 donors highlight the heterogeneity of ILCs in  
87 anonymous blood bank donors (**Fig 1E**). To identify non-ILCs in the enriched populations,  
88 we stained for NK, NKT, T, and B cells using CD16 and CD56, CD3, and CD19 and CD20,  
89 respectively. The percentage of contaminating NK and NKT cells was 0 - 5%, T cells 0 -  
90 2%, and B cells 0.4 - 7% (**S1 Fig**).

### 91 Fig 1. Enrichment and identification of ILCs from peripheral blood

92 Freshly isolated PBMCs were used for the negative selection of ILCs. **A**) Population of cells  
93 post-negative selection. Of these, ~50% were lymphoid based on their size and granularity;  
94 **B**) from the lymphoid population, we gated on the CD3<sup>-</sup> population and **C**) in the CD3<sup>-</sup>  
95 population the majority of cells were CD127<sup>+</sup> (MFI for CD127<sup>+</sup> was 2269 vs. 668 for CD127<sup>-</sup>);  
96 **D**) from the CD3<sup>-</sup> population we also screened for the presence of CRTH2 and CD117,  
97 which delimits the ILC populations; **E**) cumulative data from 60 donors showed the range of  
98 percentage, the median, and the mean of each ILC subset.

99 Initially, we maintained ILCs in RPMI/human AB serum/IL-7, but we were limited to assaying  
100 ILC phenotype and functionality during the first 24 h post-enrichment. To attempt to prolong

101 this window, we tested “NK medium”, IL-2, and pyruvate. We found that the combination of  
102 RPMI/human AB serum (10%), IL-7 (10 ng/mL), and sodium pyruvate (1 mM) prolonged  
103 the phenotypic stability of the ILCs until ~48 h post enrichment. Of note, IL-7 induces the  
104 internalisation of CD127, the  $\alpha$  chain of the IL-7R. Therefore, from then on, we also gated  
105 on CD3<sup>-</sup>/CD127<sup>low</sup> cells, followed by CRTH2 and CD117 to identify the ILCs.

## 106 **ILCs take up HAdV-C5, -D26 and -B35**

107 Several cells are involved in the initial response to viral infections. ILCs could influence the  
108 immune response by responding to cells that take up viruses and/or by taking up the virus  
109 directly. To determine whether ILCs take up HAdVs, we incubated the cells with replication-  
110 defective ( $\Delta$ E1) HAdV-C5, -D26, or -B35 vectors encoding GFP variants. At 24 h post-  
111 challenge, we found an average uptake efficacy of 13.5% for HAdV-C5, 13% for -D26, and  
112 17% for -B35 (**Fig 2A**). We then broke these data down into the uptake of each HAdV type  
113 by each ILC subset. Globally, ILC2s take up all three HAdVs more efficiently than ILC1 &  
114 3s (**Fig 2B-D**). The uptake of each HAdV for a given subset of ILCs, shows that ILC1 and  
115 ILC3s take up more HAdV-B35, followed by -C5 and -D26 (**S2 Fig**). ILC2s more readily take  
116 up HAdV-C5 and -B35. Each ILC subset thus shows a modestly variable uptake profile  
117 depending on the HAdV type. The notable difference in efficacy between donors (e.g., 0 -  
118 80% of cells for HAdV-B35) is not unique to ILCs: primary cultures of monocytes and  
119 moDCs also show high interdonor variability [32–34]. Together, these data suggest that all  
120 ILC subsets could be involved in the detection of HAdV capsids.

## 121 **Fig 2. Evaluation of the capacity of ILCs to take up HAdV-C5, -D26 and -B35**

122 HAdV vector-mediated GFP expression in total ILCs and in ILC subsets was quantified 24  
123 h post-incubation (n = 16). The panels on the left (colour-coded to facilitate ILC subset  
124 identification) are representative data from a single donor, while panels on the right are  
125 cumulative data. **A**) Result from one donor after HAdV-D26 uptake and mean percentages  
126 of total ILCs expressing GFP after infection; **B-D**) For each HAdV type, result from one

127 donor after uptake by ILC1, ILC2, or ILC3 and mean percentages of the ILC subsets  
128 expressing GFP after infection with HAdV-C5 (**B**), HAdV-D26 (**C**), or HAdV-B35 (**D**) (right  
129 panel). Statistical analyses were performed using paired Student's *t* test by comparing  
130 uninfected cells and cells challenged with the HAdVs (ns,  $p > 0.05$ , \*  $p \leq 0.05$ , \*\*  $p \leq 0.01$ ,  
131 \*\*\*  $p \leq 0.001$ ).

### 132 **ILCs express receptors used by HAdV-C5, -D26 and -B35**

133 We then screened for the receptors by which HAdVs could be taken up. CAR  
134 (coxsackievirus and adenovirus receptor) is a single-pass transmembrane cell adhesion  
135 molecule expressed by many cell types and is a primary attachment molecule for numerous  
136 HAdV types [35,36]. We were unable to detect CAR on ILCs (**Fig 3A**). DC-SIGN (or CD209)  
137 [37,38], a C-type lectin receptor present on the surface of macrophages, and conventional  
138 and plasmacytoid DCs, is a low affinity/high avidity receptor for some HAdV types [39].  
139 Similar to CAR, we were unable to detect DC-SIGN on ILCs (**Fig 3B**). MHC class I (HLA-  
140 ABC) molecules have also been reported to act as a receptor for HAdV-C5 [40], and are  
141 high on ILCs (**Fig 3C**). Of note, the diverse haplotypes could be an explanation for the inter-  
142 donor variability in HAdV type uptake efficacy. CD46, a type I transmembrane protein that  
143 is part of the complement system, is used by some cells to take up HAdV-D26 and -B35  
144 [41,42]. CD46 was readily detected on essentially all ILCs (**Fig 3D**). We also quantified the  
145 level of CD49d (integrin  $\alpha_4$ ), which is a low affinity auxiliary receptor for some HAdVs,  
146 including HAdV-C5 [43] and was expressed by more than 90% of the ILCs (**Fig 3E**, gMFI  
147 for levels can be found in **S3 Fig**). Finally, desmoglein 2 (DSG2), another cell adhesion  
148 molecule, is used by some cells to take up some species B and D HAdVs [44]. DSG2 was  
149 undetectable on ILCs. Together, these data shed light on the potential mechanism by which  
150 ILCs take up HAdV-C5, -D26 and -B35, and are globally consistent with vector-mediated  
151 GFP expression.

### 152 **Fig 3. Expression of candidate HAdV receptors by human peripheral blood ILCs**



153 Levels of **A)** CAR, **B)** DC-SIGN, **C)** HLA-ABC (MHC-I), **D)** CD46, and **E)** and CD49d, in  
154 freshly isolated total ILCs, ILC1, ILC2 and ILC3. Cell populations were normalised to 100%.  
155 Data are representative of 2 - 4 donors.

## 156 **ILC phenotypic activation and cytokine secretion after HAdV** 157 **uptake**

158 ILCs orient adaptive immune responses through the production of cytokines. We therefore  
159 examined cytokines involved in antiviral, and initiation or orientation of adaptive immunity  
160 following challenge with HAdVs. Due to the limited number of cells/donors, we screened  
161 total ILCs. Compared to mock-treated cells, we found an antiviral response consisting of IL-  
162  $1\beta$ , TNF, IFN- $\lambda_1$ , and IFN- $\gamma$  (<100 pg/ml); IL-8 and INF- $\beta$  (100 - 200 pg/ml), and IFN- $\lambda_{2/3}$   
163 (>200 pg/ml), and a Th response consisting of IL-5, IL-6, IL-9, IFN- $\gamma$  and IL-21 (<100 pg/ml)  
164 (**Fig 4A**). TNF and IFN- $\gamma$ , which have antiviral and Th functions, were comparable in each  
165 panel.

166 We then characterized the HAdV-induced phenotypic activation. Using ILCs immediately  
167 post-enrichment, we quantified the cell surface levels of CD69, an early activation marker  
168 expressed by lymphoid cells; CD161, whose expression increases during inflammation  
169 (mainly on NK cells); the costimulatory molecules CD80 and CD86; and MHC II molecules.  
170 We found that <20% of ILCs had baseline levels of CD69 (**Fig 4B**), while approximately  
171 43% of the cells were CD161<sup>+</sup> (**Fig 4C**). CD80, CD86, and HLA-DR levels were  
172 undetectable (**S4 Fig**). LPS challenge modestly increased the percentage of CD69<sup>+</sup> ILCs  
173 (35%), with the greatest impact on ILC3s (40%). After incubation with HAdV-C5, -D26, or -  
174 B35, we observed a selective increase in CD69 levels in ILC2s (**Fig 4D**). Therefore, ILCs  
175 challenged with HAdVs secreted cytokines with antiviral and Th activities and modestly  
176 increased a phenotypic marker of activation.

177 **Fig 4. Cytokine release and phenotypic profile of ILCs after HAdV uptake**

178 A) Cytokines belonging to an antiviral panel or a Th screen were quantified from the  
179 supernatant of HAdV-challenged ILCs by CBA (n = 5). Cytokine levels are denoted by the  
180 colour code and the results were analyzed with the LegendPlex™ software. Only the  
181 cytokines whose levels were at least 2-fold higher than that of the controls are shown.  
182 Baseline levels of B) CD69 and C) CD161 in freshly isolated total ILCs, ILC1, ILC2 and ILC3  
183 (n > 26). Cell populations were normalised to 100% (n ≥ 5); D) CD69 levels in ILC2 post  
184 challenge with HAd-C5, -D26, or B35 (n = 15).

## 185 **Impact of pre-existing immunity against HAdVs on the ILC** 186 **response**

187 HAdV-based vaccines are being used to limit COVID-19 severity and are being trialled for  
188 other emerging pathogens [45]. The use of HAdV-C5-based vaccines has shown that, while  
189 pre-existing humoral immunity typically reduces vaccine efficacy, vaccine-induced  
190 inflammation is not significantly affected [45]. Secondly, a long-term issue will be the ability  
191 to reuse HAdV-based vaccines after their nearly global deployment against SARS-CoV-2,  
192 which should induce widespread HAdV type-specific immunity. Depending on the cell type  
193 and the presence of FcγRs, anti-HAdV antibodies can either inhibit or increase HAdV uptake  
194 [46–49]. For example, most sera containing HAdV NAb are characterized by their ability  
195 to inhibit infection of epithelial cells. Yet, these same sera can increase HAdV uptake by  
196 professional APCs via FcγRIII (CD16) [34,50]. FcγR-mediated uptake also increases the  
197 phenotypic and functional maturation of moDCs and plasmacytoid DCs [25,33,34,50]. By  
198 contrast, Ab that neutralize HAdV-B35 infection of epithelial cells also decreased transgene  
199 expression in DCs [51].

200 Therefore, we asked whether NAb impact HAdV uptake by ILCs. To form the complexes,  
201 we used selected sera that neutralized HAdV-C5, -D26 and -B35 infection of epithelial cells  
202 [51]. Following the challenge of ILCs with the HAdV-NAb complexes, we observed a modest  
203 increase in cells expressing the transgene when type-specific NAb were complexed HAdV-

204 C5 and -D26 compared to HAdVs alone (**Fig 5A**). Consistent with previous data, we found  
205 that serum that contained HAdV-B35 NAbS tended to decrease the percentage of GFP<sup>+</sup>  
206 ILCs. When broken down into ILC subsets, we observed a modest increase in GFP levels  
207 in the presence of NAb-complexed HAdVs for ILC1 and 2 (**Fig 5B & 5C**). However, for ILC3  
208 challenged with HAdV-C5-NAb complexes, we observed a modest decrease in the  
209 percentage of GFP<sup>+</sup> ILCs (**Fig 5D**).

210 If one compares the subsets, ILC2s (34%) and ILC1s (29%) are more permissive to HAdV-  
211 D26-NAb complexes than ILC3s (19%). In addition, ILC1s (15%) appeared to take up more  
212 particles/cell (higher gMFI) than ILC3s (7.5%) after HAdV-B35-NAb complex challenge (**S5**  
213 **Fig**). We therefore quantified the level of FcγRIII, and found lower levels on the surface of  
214 ILC1 and 2s versus ILC3s (**Fig 5E**). Globally, ILC2 were the most permissive, while ILC3s  
215 appeared the least capable of taking up HAdV complexed with NAbS (summarized in **S5**  
216 **Fig**).

### 217 **Fig 5. ILC uptake of HAdV-NAb complexes and impact on FcγRIII levels**

218 GFP levels in total ILCs, ILC1, ILC2 and ILC3 24 h post-incubation with each HAdV ± NAbS.  
219 Sera “E”, “A”, and “14” inhibit HAdV-C5, -D26, or -B35, respectively, uptake by epithelial  
220 cells. **A)** Mean percentages of total ILCs expressing GFP after HAdV ± NAbS challenge. **B-**  
221 **D)** Mean percentages of ILC1, ILC2, and ILC3 expressing GFP after challenge ± NAbS. **E)**  
222 Levels of FcγRIII in freshly isolated total ILCs, ILC1, ILC2, and ILC3. Statistical analyses  
223 were performed using paired Student’s *t* test by comparing uninfected cells and cells  
224 challenged with the HAdVs (ns =  $p > 0.05$ , \*  $p \leq 0.05$ , \*\*  $p \leq 0.01$ , \*\*\*  $p \leq 0.001$ ) ( $n \geq 5$ ).

225 We then characterized phenotypic activation induced by HAdV-NAbS. In contrast to the  
226 HAdVs alone, we found a decrease in CD69 levels following a challenge by NAb-complexed  
227 HAdVs (**Fig 6A**). Moreover, each ILC subset tended to have less CD69 on the surface  
228 following a challenge by NAb-complexed HAdVs (**Fig 6B**). Together, these data

229 demonstrate that pre-existing B cell immunity can differentially impact the ILC response to  
230 HAdVs, likely based on molecules used to take up HAdVs or HAdV-NAb complexes.

### 231 **Fig 6. Phenotypic profile by ILCs after NAb-HAdV uptake**

232 CD69 levels were quantified 24 h post-challenge for each HAdV  $\pm$  NAb complex for **A)** total  
233 ILCs and **B)** the ILC subsets ( $n \geq 5$ ). Sera “E”, “A”, and “14” inhibit HAdV-C5, -D26, or -B35,  
234 respectively, uptake by epithelial cells. Statistical analyses were performed using paired  
235 Student’s *t* test by comparing uninfected cells and cells challenged with the HAdVs ( $ns = p$   
236  $> 0.05$ , \*  $p \leq 0.05$ , \*\*  $p \leq 0.01$ , \*\*\*  $p \leq 0.001$ ).

### 237 **Pattern recognition receptors**

238 The initial 24 h can be critical when responding to pathogens or vaccines. It was noteworthy  
239 that ILC uptake of HAdVs induced IL-8 secretion, which will lead to the recruitment of  
240 monocytes and neutrophils (**Fig 4A**). The cytoplasmic content of neutrophils can be as  
241 much as 20% HDPs, effector molecules of the innate immune system. Moreover, we  
242 previously showed that human neutrophil protein-1 (HNP-1) and lactoferrin bind to HAdV-  
243 C5, -D26 and -B35 and, by acting as bridges via TLR4, increase HAdV uptake by DCs [25–  
244 28].

245 As phenotypic and functional activation of innate immunity are initiated by the engagement  
246 of PRRs, we screened for the presence of PRRs and markers that serve could as inducers  
247 of activation. Despite differences between donors, we found that the majority of the CD3-  
248 /CD127<sup>+</sup> cells contain relatively low levels of TLR2 (<5%), TLR4 (<7%) and TLR9 (<6%),  
249 but significant intracellular levels of TLR3 (**Fig 7A & 7B and S6 Fig**). Importantly though,  
250 LPS, a quintessential TLR4 ligand, induces ILCs to secrete pro-inflammatory cytokines,  
251 suggesting that while TLR4 levels are not high, TLR4 signalling can be triggered (**S6 Fig**).  
252 We therefore asked if HNP-1 or lactoferrin influences ILC uptake of HAdVs. ILCs were  
253 incubated with HAdV-HNP-1 or HAdV-lactoferrin complexes and uptake was quantified by  
254 GFP expression. In contrast to DCs, we found that the HDP-HAdV complexes either had

255 no effect or were less readily taken up by ILCs (**Fig 7C and S7 Fig**). We then quantified  
256 ILC cytokine secretion induced by the HAdV-HDP complexes. When focusing on IL-8 levels,  
257 we again found that the response to HAdV-C5 and -D26 separated from that of -B35: when  
258 HAdV-C5 and -D26 were incubated with HNP-1 or lactoferrin, ILCs secreted higher levels  
259 of IL-8, while HAdV-B35 plus HNP-1 or lactoferrin decreased IL-8 levels compared to the  
260 HAdV alone. (**Fig 7D**). The levels of other cytokines did not change notably with respect to  
261 the addition of HNP-1 or lactoferrin (**Fig 7E**).

### 262 **Fig 7. PRR expression and impact of HDPs on uptake and cytokine profile**

263 The levels of **A**) TLR3 by ILCs; and **B**) TLR9 by total ILCs, ILC1, ILC2, and ILC3. Cell  
264 populations were normalised to 100%. Results are representative of 2 - 5 donors. **C**) ILC  
265 uptake of HAdVs complexed with HNP-1 or lactoferrin: GFP expression by ILCs was  
266 quantified 24 h post-challenge with each HAdV  $\pm$  HDP (HNP-1 or lactoferrin) for total ILCs  
267 ( $n = 4$ ). **D**) Cytokines release in the presence of HNP-1 or lactoferrin: cytokines belonging  
268 to an antiviral panel and a Th cytokine panel in the supernatant of HAdV-infected ILCs was  
269 quantified using CBA ( $n = 4$ ). Cytokine levels are denoted by the colour code and the results  
270 were analyzed with the LegendPlex™ software. Only the cytokines whose secretion level  
271 was at least 2-fold higher than that of the controls are presented. **E**) IL-8 secretion was  
272 assessed 24 h post-challenge with each HAdV  $\pm$  HDP for total ILCs ( $n = 4$ ). Statistical  
273 analyses were performed using paired Student's *t* test by comparing uninfected cells and  
274 cells challenged with the HAdVs (ns =  $p > 0.05$ , \*  $p \leq 0.05$ , \*\*  $p \leq 0.01$ , \*\*\*  $p \leq 0.001$ ).

### 275 **Phenotypic maturation and cytokine secretion of bystander ILCs**

276 Because ILCs respond to local cues, we tried to generate an *ex vivo* environment to  
277 characterize their response to DCs challenged with HAdVs. In this approach, HAdVs  $\pm$   
278 NAbs were incubated with moDCs, the moDCs were rinsed to remove HAdVs and NAbs,  
279 fresh medium was added, and this latter media was collected 18 h later and added to ILCs.  
280 Initially, we observed a 2-3-fold increase in CD69 levels in ILCs due to moDC supernatant

281 **(Fig 8A-C)**. The supernatant from LPS-challenged DCs induced a modest increase in CD69  
282 levels on ILCs, with the greatest impact on ILC3s. When comparing the indirect impact of  
283 HAdV-C5, D26 and -B35, it is noteworthy that HAdV-C5, the “gold standard” for HAdV  
284 immunogenicity, had the lowest impact on ILC1 and ILC2 phenotypic maturation. When  
285 assaying the supernatant from DCs challenged with HAdV-C5-NAb complexes, the number  
286 of CD69<sup>+</sup> ILC1 and 2s increased compared with HAdV-C5 alone. In the case of HAdV-D26-  
287 NAb complexes, CD69<sup>+</sup> levels either decreased (ILC2s, **Fig 8B**) or did not change (ILC1  
288 and 3s, **Fig 8A & 8C**). Finally, finding serum that neutralizes HAdV-B35 is challenging: in  
289 the greater than 400 sera analyzed, we found 1 that inhibited HAdV-B35 infection of  
290 epithelial cells. However, due to limited quantities of serum, we were able to perform only 2  
291 assays and therefore the interpretation of these data should take this into account. We  
292 found that in contrast to ILC1 and 2s, the ILC3 response to HAdV-B35-NAb complexes was  
293 notably higher (**Fig 8C**).

294 Using the bystander challenge model, we also explored the cytokines secreted by ILCs. As  
295 above, we found a mixed antiviral and Th response consisting of TNF, IFN- $\lambda_1$ , IL-6,  
296 CXCL10, and IL-8 (**Fig 8D and S8 Fig**). We concluded that bystander ILCs respond to DCs  
297 challenged with HAdVs  $\pm$  NAbs and that this response could vary in hosts who have pre-  
298 existing HAdV immunity.

### 299 **Fig 8. Bystander effect on ILC maturation**

300 We quantified CD69 levels of, and cytokines secreted by, ILCs after indirect challenge  
301 moDCs incubated with HAdVs  $\pm$  NAbs. CD69 levels were measured 24 h post-challenge  
302 for each HAdV  $\pm$  NAbs for total ILCs and different ILC subsets ( $n \geq 2$ ). Mean percentages  
303 of **A)** total ILCs, **B)** ILC1; **C)** ILC2, and **D)** ILC3, expressing CD69. Statistical analyses  
304 were performed using paired Student's *t* test by comparing uninfected cells and challenged  
305 cells (ns  $p > 0.05$ , \*  $p \leq 0.05$ , \*\*  $p \leq 0.01$ , \*\*\*  $p \leq 0.001$ ). **E)** The level of cytokines belonging  
306 to an antiviral panel and a Th cytokine panel from bystander ILCs ( $n = 3$ ). Cytokine levels

307 were denoted by the colour code and results were analyzed with the LegendPlex™  
308 software. Only the cytokines whose secretion level was at least 2-fold higher than that of  
309 the controls are shown.

## 310 **Discussion**

311 The multitasking roles that ILCs play during virus infection have been addressed in  
312 numerous situations [10]. However, how pre-existing immunity against a virus, or virus-  
313 based vaccines, impacts an ILC response is poorly understood. In this study, we addressed  
314 how human ILCs, isolated from peripheral blood, respond to three human adenovirus types,  
315 from three species. In addition to the binary ILCs - HAdVs interactions, we investigated how  
316 the presence of NAb and HDPs impacted the ILC response. Because ILC responses are  
317 influenced by their environment, we also created an assay to explore how HAdV uptake by  
318 antigen-presenting cells (e.g., DCs) influences ILC physiology. We show that *i*) the three  
319 ILC subsets can be infected by three HAdV types with variable efficacy; *ii*) depending on  
320 the HAdV type, NAb can either increase or decrease uptake by ILCs; *iii*) ILCs can respond  
321 differentially to HAdVs alone or those bound by NAb or HDPs; and *iv*) the phenotypic  
322 profile of, and cytokine release by, ILCs is also responsive to indirect stimulation by HAdV-  
323 challenged DCs. Our results demonstrate that the adaptive immune response feeds back  
324 into ILC function, which likely impacts HAdV-based vaccine efficacy.

325 When working with primary ILCs from multiple donors, the heterogeneity of the response is  
326 typically considerable. ILC levels in peripheral blood vary with age (up to 7-fold less in older  
327 adults compared to children), sex (less abundant in males), and whether responding to a  
328 viral infection [11]. While our approach inherently creates challenges for broad  
329 interpretations, it nonetheless represents a sampling of the diverse human responses. An  
330 important issue to take into account is that we poorly understand how modest changes in  
331 the level of cell surface markers of activation, or cytokines secreted impact immune  
332 responses. Moreover, using ILCs from peripheral blood creates additional challenges.



333 Initially, ILCs seed tissues early in the life. During adolescence, it appears that ILCs are  
334 replaced by tissue-resident T cells that undertake a role in immune surveillance [52,53].

335 Like many respiratory pathogens, the initial HAdV-associated illness is typically a childhood  
336 event. HAdVs also cause disease in multiple tissues (eyes, respiratory and gastro-intestinal  
337 tracts). The divergent response from tissue resident ILCs should help drive a robust and  
338 complex adaptive response to HAdVs. Moreover, in spite of robust anti-HAdV B- and T-cell  
339 responses in most adults, HAdVs can maintain long-term persistence [54]. Whether the  
340 initial immune response, which likely involves ILCs, plays a role in latency or HAdV-based  
341 vaccine efficacy is unknown. Given ILC ability of self-renewal in tissue, it is possible that  
342 antigen-specific memory ILCs [55] will, someday, be identified.

343 Are childhood infections and responses to HAdV-based vaccines in adolescents or adults  
344 linked? An argument could be put forward that there is an incompatibility in locales – HAdV-  
345 based vaccines are, for the moment, delivered subdermal/intramuscularly, whereas HAdV  
346 infections, to the best of our knowledge, rarely occur there. Importantly though, ILCs do not  
347 have an obligate tissue-specific residency [56]. ILC homing receptors suggest a context-  
348 dependent capacity of some subsets for inter-organ trafficking. In addition, in spite of the T-  
349 cell-like functional [8,9], all ILC subsets took up HAdVs. We also observed variations in the  
350 level of potential HAdV receptors, which was consistent with uptake efficacy. These data  
351 suggest that ILCs can play a direct role in the initiation of the immune response. Moreover,  
352 these data also suggest that functional diversification into Th1, Th2 and Th17/22-like T cells  
353 plays a minor role during initial interactions with HAdVs. However, an analysis that we were  
354 technically unable to perform was to identify which ILCs secrete which cytokines. ILC uptake  
355 of HAdVs generally increased CD69 levels, while the addition of NAbs tended to decrease  
356 CD69 level. These observations do not dovetail well with the uptake profile where NAb-  
357 HAdV-C5 and -D26 complexes increased the expression of the transgene by ILCs. The  
358 challenge of bystander ILCs via infected moDCs also induced a global increase in CD69  
359 levels. The presence of NAbs during moDC challenge increased CD69 levels by ILCs



360 compared to HAdVs alone for -C5 and -B35 and to a decrease for -D26. These patterns  
361 underscore the complex role of ILCs after HAdV interactions, particularly in the presence of  
362 NAbs.

363 Yet, as expected, the ILC antiviral response included type I (IFN- $\beta$ ), II (IFN- $\gamma$ ) and III (IFN-  
364  $\lambda$ ) IFNs. The levels of TNF, IL-6 and IL-21 were moderate and potentially have a synergistic  
365 action rather than individual. TNF is a pro-inflammatory cytokine with a more general role  
366 in the induction and stimulation of surrounding immune cells. IL-6 contributes to host  
367 defence by stimulating acute phase responses, haematopoiesis and immune responses  
368 [57], but has fundamentally different activities depending on its cytokine partners [58]. IL-  
369 21 is a pro-inflammatory, notably inducing IL-8 secretion, maintaining CD8 T cell function  
370 and enhancing antigen presentation by phagocytes [59,60]. In the context of potential HAdV  
371 uptake during the first 24 h, the recruitment of HDP-loaded neutrophils could have a  
372 significant impact if HNP-1-mediated HAdV uptake influences ILCs directly or indirectly  
373 (increasing uptake by local phagocytes) [61]. Unexpectedly, the bystander ILC response  
374 induced a cytokine profile similar to that of direct HAdV uptake, but in higher level. We also  
375 note the secretion of CXCL10, a pleiotropic molecule that can promote the chemotactic  
376 activity of CXCR3<sup>+</sup> cells, induces apoptosis, and is associated with antiviral responses [62–  
377 66].

378 From these data, we concluded that the ILC response to HAdVs varies in multiple situations  
379 **(S9 Fig)**. Moreover, the vast and intriguing inter-donor variability leaves little room for a  
380 simple, text-book style conclusion. Identifying biomarkers for ILC status and differences  
381 could enable better exploitation and understanding of their responses to viruses and virus-  
382 based vaccines.

## 383 **Materials & Methods**

### 384 **Ethics statement**

385 Human blood samples (fresh blood and buffy coat) were obtained from healthy adult  
386 anonymous donors at the regional blood bank (EFS, Montpellier, France). The study was  
387 approved by the Occitanie & Midi-Pyrenees EFS scientific board (EFS-OCPM:  
388 N°21PLER2019-0002). All donors provided written informed consent.

### 389 **Adenoviruses**

390 The HAdVs (HAdV-C5, HAdV-D26, HAdV-B35) are  $\Delta$ E1 making them replication-defective  
391 in all cells except E1-transcomplementing cells. HAdV-C5 and HAdV-D26 vectors harbor a  
392 GFP expression cassette [67] while HAdV-B35 harbour a GFP variant (YFP) cassette[68].  
393 The vectors were amplified in either human embryonic retinoblasts 911 (HER 911) or 293T  
394 E4-pIX cells and then purified to 99% by two density gradients of CsCl [34,69].

### 395 **Enrichment and selection of ILC**

396 Peripheral blood mononuclear cells (PBMC) were isolated on a Ficoll-Histopaque® 1077  
397 gradient (Sigma-Aldrich, Lyon, France). From PMBCs derived from fresh blood, innate  
398 lymphoid cells were enriched by negative immunomagnetic selection (EasySep Human  
399 Pan-ILC Enrichment Kit, cat# 17975, StemCell). The kit contained a cocktail of magnetic  
400 antibodies targeting the major cell lines of the immune system except ILCs. Enrichment was  
401 performed according to the manufacturer's instructions [70]. Freshly enriched ILCs were  
402 cultured in a complete medium consisting of RPMI supplemented with 10% human serum  
403 AB (sHAB), 10 ng/mL IL-7 (PeproTech®, Neuilly sur Seine, France), 1 mM sodium pyruvate  
404 (Gibco) and antibiotics (Penicillin 100 I.U./mL and Streptomycin 100 µg/mL). Different  
405 combinations of media were tested in the presence of IL-2, IL-12, and/or IL-7 at different  
406 concentrations (at 5, 10, 20, 30, or 90 ng/mL) or a commercial medium specific for NK cells

407 (NK MACS Medium, cat# 130-114-429, MiltenyiBiotec) with lower efficacy. From the ~60  
408 donors, we obtained, after enrichment, between  $2,7 \times 10^5$  and  $9 \times 10^5$  cells/donor, with an  
409 average of  $6.3 \times 10^5$  cells/donor. The percent yield of this enrichment protocol was from  
410 0.02% to 0,7% with a mean of 0,18%. The predicted yield is 0.05 to 0.07% of mononuclear  
411 cells.

## 412 **Isolation and differentiation of monocytes-derived DCs (moDCs)**

413 From PBMCs derived from buffy coat, monocytes are purified by CD14<sup>+</sup> expression by  
414 positive immunomagnetic selection (MACS system, MiltenyiBiotec). CD14<sup>+</sup> cells were  
415 incubated for 6 days in the presence of 50 ng/ml granulocyte-macrophage colony-  
416 stimulating factor (GM-CSF) and 20 ng/ml interleukin-4 (IL-4) (PeproTech®, Neuilly sur  
417 Seine, France). The medium used for culture was RPMI, 10% fetal bovine serum (FBS) and  
418 penicillin 100 I.U./ml and streptomycin 100 µg/ml.

## 419 **Direct infection of ILCs with HAdV vectors**

420 Approximately  $2.5 \times 10^4$  ILCs in 300 µl of complete medium were incubated in the presence  
421 of HAdV-C5-GFP, HAdV-D26-GFP or HAdV-B35-YFP at  $10^4$  physical particles (pp)/cell.  
422 The medium used for the infection step did not contain human serum. At 6 h post infection,  
423 human AB serum (10%) was added to HAdV alone and as NAb complexes. After 24 h of  
424 incubation, activation of ILCs was observed via level of the activation markers CD69 and  
425 CD161, as well as secretion of antiviral and immunomodulatory cytokines.

## 426 **Indirect stimulation of ILCs by moDCs**

427 The first step consists in the stimulation of DCs by HAdVs alone or complexed with NABs.  
428 moDCs ( $5 \times 10^5$  cells in 400 µl of complete medium) were incubated with HAdV-C5-GFP,  
429 HAdV-D26-GFP or HAdV-B35-YFP ( $10^4$  physical particles (pp)/cell) for 6 h in complete  
430 RPMI DC medium. 6 h post-infection, the moDC supernatant was discarded and the cells  
431 washed with PBS and centrifuged at 1500 rpm for 5 min to remove the HAdVs in the

432 medium. The cells are then cultured in basal ILC medium (RPMI + 10% sHAB + P/S).  
433 Approximately 18 h after the medium change (24 h post-infection), the supernatant of  
434 activated moDCs was added to freshly isolated ILCs. After 24 h of incubation in the  
435 presence of supernatants from stimulated moDCs, ILC activation was characterized by the  
436 level of the activation marker CD69, as well as the secretion of antiviral and  
437 immunomodulatory cytokines.

### 438 **Formation of Ig - HAdV complexes**

439 IVIg® or "Intravenous Immunoglobulin" (Baxter SAS, Guyancourt, France) was used as a  
440 control for IC formation and corresponds to a 95% human IgG mix from healthy donor  
441 plasma (1,000 from 50,000 donors/batch). IVIg was used in patients with acquired immune  
442 deficiencies and autoimmune diseases. For the formation of Ig - HAdV complexes, HAdV-  
443 C5-GFP, HAdV-D26-GFP or HAdV-B35-YFP were incubated in the presence of  
444 decomplemented sera from a laboratory serum bank for 25 min at room temperature[34].  
445 The sera used may or may not have antibodies specific (or neutralizing antibodies, NAbS)  
446 to the different HAdVs used (results of neutralization tests). Serum E (SE) had a very high  
447 NAb titer for HAdV-C5 (3500) but no NAbS for HAdV-D26 or -B35. Serum A (SA) had a high  
448 titer of NAbS for HAdV-D26 (2500) and low titers for HAdV-C5 (50) and -B35 (0). Serum 14  
449 (S14) had high titers of NAbS for HAdV-B35 (2200) and HAdV-C5 (2000) and a low titer for  
450 HAdV-D26 (120). This was the only serum in the range tested ( $n > 400$ ) for which we  
451 detected the presence of a high titer of HAdV-B35 NAbS. After incubation, the newly formed  
452 Ig - HAdV complexes were cultured with the different cell types for 24 h. The ILCs (between  
453  $2 \cdot 10^4$  cells and  $3 \cdot 10^4$  cells) or moDCs ( $5 \times 10^5$  cells) were put in the presence of  $10^4$  physical  
454 particles (pp)/cell of HAdVs.

### 455 **Formation of HDP - HAdV complexes**

456 ILCs (between  $2 \times 10^4$  cells and  $3 \times 10^4$  cells) were were incubated with  $10^4$  physical  
457 particles (pp)/cell of HAdVs (in 300 ul of complete medium). For the formation of HDP -

458 HAdV complexes, HAdV-C5-GFP, HAdV-D26-GFP or HAdV-B35-YFP were incubated in  
459 the presence of HNP-1 (3.50 ug/mL) or lactoferrin (100 ug/mL) for 30 min at room  
460 temperature [26,27]. These concentrations were chosen to reproduce those found in an  
461 inflammatory environment of infected tissues. GFP levels and cytokines release were  
462 assessed after 24 h postinfection.

## 463 **Flow cytometry**

464 CD127 FITC (cat# 560549, BD Pharmingen) or PE-CF594 (cat# 562397, BD Pharmingen)  
465 clone HIL-7R-M21, CD3 PerCP-Cy5. 5 (cat# 560835, BD Pharmingen) or CD3 APC (cat#  
466 300412, BioLegend®) clone UCHT1, CRTH2 (CD294) PE clone BM16 (cat# 563665, BD  
467 Pharmingen), CD117 PE-Cy7 clone 104D2 (cat# 339217, BD Pharmingen) were used to  
468 identify the population of ILCs and exclude T cells (potential depletion contaminants). CD69  
469 APC (cat# 555533, BD Pharmingen) or FITC (cat# 347823, BD Biosciences) and CD161  
470 PE-Cy5 (cat# 551138, BD Pharmingen) were used to observe activation of ILCs after  
471 stimulation. The level of different cellular receptors involved in HAdVs infection was  
472 observed by using a panel of antibodies. Anti-CAR (cat# AF336, R&D systems) was used  
473 at 1/10th with Donkey anti-goat Alexa Fluor 488 secondary antibody (cat# A11055,  
474 Invitrogen), DC-SIGN (CD209) (cat# 561764, BD Pharmingen), Desmoglein 2 FITC (DSG2)  
475 clone AH12.2 [71] (cat# sc-80663FITC, Santa Cruz Biotechnology), CD46 APC (targets  
476 MCP protein) clone TLA-2-10 (cat# 352405, BioLegend®), CD49d APC (targets  $\alpha 4$   
477 integrins) clone 9F10 (cat# 304307, BioLegend®), CD16 (targets Fc $\gamma$ RIII) clone 3G8 (cat#  
478 302011, BioLegend®). Several Toll-Like receptors were explored: TLR2 FITC (CD282)  
479 clone TL2.1 (cat# 309706, BioLegend®), TLR3 PE (CD283) clone TLR-104 (cat# 315010,  
480 BioLegend®), TLR4 APC (CD284) (cat# 130-100-150), MiltenyiBiotec) and TLR9 APC  
481 clone eB72-1665 (cat# 560428, BD Pharmigen). The level of HLA-ABC FITC (cat# 557348,  
482 BD Pharmigen), HLA-DR FITC (cat# 555811, BD Pharmigen), CD80 FITC (cat# 557226,  
483 BD Pharmigen), CD83 FITC (cat# 556910, BD Pharmingen) and CD86 APC (cat# 555660,

484 BD Pharmingen) was also analysed for ILCs or moDC activation. GFP/YFP expression by  
485 infected ILCs or moDCs as well as other previously mentioned markers were assessed by  
486 flow cytometry (NovoCyte®). Antibody volumes were adapted to the number of cells for  
487 each cell type according to the manufacturer's instructions. Each cell was incubated for 30  
488 min at 4°C with gentle agitation. The cells were then washed twice (1800 rpm, 4°C, 5 min)  
489 and resuspended in 130 µL of buffer (PBS + fetal calf serum). 7-AAD (7-aminoactinomycin  
490 D, cat# 559925, BD Pharmingen) was added at 1/250<sup>th</sup> v/v, 10 min before reading to  
491 observe cell viability in each sample. All flow cytometry assays were obtained with the  
492 Novocyte® flow cytometer and analyzed with NovoExpress software unless otherwise  
493 mentioned.

#### 494 **Cytometric Beads Assay (CBA)**

495 Supernatants were collected and cytokine secretion was measured using two panels of 13  
496 cytokines (antiviral response and T helper cytokines) by using CBA, a multiplex cytokine  
497 quantification (LEGENDplex HU Anti-Virus Response Panel (13-plex) and LEGENDplex HU  
498 Th Cytokine Panel (13-plex) (cat# 740390 and cat# 740722, BioLegend) following the  
499 manufacturer's instructions. The concentration of each analyte will be quantified by flow  
500 cytometry via the signal intensity and determined using known standard curve and the  
501 analysis software provided by the manufacturer (LEGENDplex). We selected the cytokines  
502 of interest from a secretion 2-fold higher than control for HAdVs and 2-fold higher than the  
503 HAdV alone condition for immune-complexes.

#### 504 **Statistical analysis**

505 Data were analyzed by GraphPad Prism 5 software. The significance of the results was  
506 determined by using Student's paired *t*-test to make comparisons within each donor.

#### 507 **Author contributions**

508 Study design & conception: OP, FM and EJK; project direction: FM and EJK. Performed  
509 experiments, OP; and analyzed data: OP, FM and EJK. Wrote the manuscript: OP & EJK.  
510 Secured funding: EJK.

## 511 **Funding statement**

512 This study was supported by Ph.D. fellowship from the French Minister of Education, the  
513 Institut de Génétique Moléculaire de Montpellier (IGMM), and the French national center of  
514 scientific research (CNRS). The funders had no role in study design, data collection and  
515 analysis, decision to publish, or preparation of the manuscript.

## 516 **Conflict of Interest**

517 The research was conducted in the absence of any commercial or financial relationships  
518 that could be construed as a potential conflict of interest.

## 519 **Acknowledgements**

520 We thank the imaging facility MRI (ANR-10-INBS-04), Etablissement Français du Sang,  
521 and the Plateforme de Vectorologie de Montpellier (PVM, IGMM). We thank Coraline  
522 Chéneau for vector preparation, and Anne-Sophie Bedin (UMR 1058, Inserm, Montpellier)  
523 for help with the labelling of ILCs. We thank EKL members for constructive comments. We  
524 are grateful to Eric Weaver and Andre Lieber for providing HAdV-D26 and HAdV-B35,  
525 respectively.



## 526 References

- 527 1. Spits H, Artis D, Colonna M, Diefenbach A, Di Santo JP, Eberl G, et al. Innate lymphoid cells--a proposal  
528 for uniform nomenclature. *Nat Rev Immunol.* 2013 Feb;13(2):145–9. doi: 10.1038/nri3365
- 529 2. Peters CP, Mjösberg JM, Bernink JH, Spits H. Innate lymphoid cells in inflammatory bowel diseases.  
530 *Immunol Lett.* 2016;172:124–31. doi: 10.1016/j.imlet.2015.10.004
- 531 3. Kim CH, Hashimoto-Hill S, Kim M. Migration and Tissue Tropism of Innate Lymphoid Cells. *Trends*  
532 *Immunol.* 2016 Jan;37(1):68–79. doi: 10.1016/j.it.2015.11.003
- 533 4. Monticelli LA, Sonnenberg GF, Abt MC, Alenghat T, Ziegler CGK, Doering TA, et al. Innate lymphoid cells  
534 promote lung tissue homeostasis following acute influenza virus infection. *Nat Immunol.* 2011  
535 Nov;12(11):1045–54. doi: 10.1031/ni.2131
- 536 5. Britanova L, Diefenbach A. Interplay of innate lymphoid cells and the microbiota. *Immunol. Rev.* 2017  
537 Sep 1;279(1):36–51. doi: 10.1111/imr.12580
- 538 6. Mortha A, Burrows K. Cytokine Networks between Innate Lymphoid Cells and Myeloid Cells. *Front*  
539 *Immunol.* 2018;9:191. doi: 10.3389/fimmu.2018.00191
- 540 7. Golebski K, Ros XR, Nagasawa M, van Tol S, Heesters BA, Aglmous H, et al. IL-1 $\beta$ , IL-23, and TGF- $\beta$   
541 drive plasticity of human ILC2s towards IL-17-producing ILCs in nasal inflammation. *Nat Commun.* 2019  
542 14;10(1):2162. doi: 10.1038/s41467-019-09883-7
- 543 8. Artis D, Spits H. The biology of innate lymphoid cells. *Nature.* 2015 Jan 15;517(7534):293–301. doi:  
544 10.1038/nature14189
- 545 9. Sciumè G, Shih H-Y, Mikami Y, O’Shea JJ. Epigenomic Views of Innate Lymphoid Cells. *Front Immunol.*  
546 2017;8:1579. doi: 10.3389/fimmu.2017.01579
- 547 10. Vivier E, Artis D, Colonna M, Diefenbach A, Di Santo JP, Eberl G, et al. Innate Lymphoid Cells: 10 Years  
548 *On. Cell.* 2018;174(5):1054–66. doi: 10.1016/j.cell.2018.07.017
- 549 11. Silverstein NJ, Wang Y, Manickas-Hill Z, Carbone C, Dauphin A, Boribong BP, et al. Innate lymphoid cells  
550 and COVID-19 severity in SARS-CoV-2 infection. Giamarellos-Bourboulis EJ, Rath S, Giamarellos-  
551 Bourboulis EJ, Kyriazopoulou E, editors. *eLife.* 2022 Mar 11;11:e74681. doi: 10.7554/eLife.74681
- 552 12. Cooper RJ, Hallett R, Tullo AB, Klapper PE. The epidemiology of adenovirus infections in Greater  
553 Manchester, UK 1982–96. *Epidemiol Infect.* 2000 Oct;125(2):333–45.
- 554 13. D’Ambrosio E, Del Grosso N, Chicca A, Midulla M. Neutralizing antibodies against 33 human  
555 adenoviruses in normal children in Rome. *J Hyg (Lond).* 1982 Aug;89(1):155–61.
- 556 14. Evans AS. Latent adenovirus infections of the human respiratory tract. *Am J Hyg.* 1958 May;67(3):256–  
557 66. doi: 10.1093/oxfordjournals.aje.a119932
- 558 15. Garnett CT, Talekar G, Mahr JA, Huang W, Zhang Y, Ornelles DA, et al. Latent species C adenoviruses  
559 in human tonsil tissues. *J Virol.* 2009 Mar;83(6):2417–28. doi: 10.1128/JVI.02392-08
- 560 16. Leung AY-H, Chan M, Cheng VC-C, Yuen K-Y, Kwong Y-L. Quantification of adenovirus in the lower  
561 respiratory tract of patients without clinical adenovirus-related respiratory disease. *Clin Infect Dis.* 2005  
562 May 15;40(10):1541–4. doi: 10.1086/429627
- 563 17. Ghebremedhin B. Human adenovirus: Viral pathogen with increasing importance. *Eur J Microbiol*  
564 *Immunol (Bp).* 2014 Mar;4(1):26–33. doi: 10.1556/EuJMI.4.2014.1.2
- 565 18. Mennechet FJD, Paris O, Ouoba AR, Salazar Arenas S, Sirima SB, Takoudjou Dzomo GR, et al. A review  
566 of 65 years of human adenovirus seroprevalence. *Expert Rev Vaccines.* 2019 Jun;18(6):597–613. doi:  
567 10.1080/14760584.2019.1588113
- 568 19. Scott MK, Chommanard C, Lu X, Appelgate D, Grenz L, Schneider E, et al. Human Adenovirus  
569 Associated with Severe Respiratory Infection, Oregon, USA, 2013–2014. *Emerg Infect Dis.* 2016  
570 Jun;22(6):1044–51. doi: 10.3201/eid2206.151898
- 571 20. Capasso C, Garofalo M, Hirvonen M, Cerullo V. The Evolution of Adenoviral Vectors through Genetic and  
572 Chemical Surface Modifications. *Viruses.* 2014 Feb 17;6(2):832–55. doi: 10.3390/v6020832
- 573 21. Zhang C, Zhou D. Adenoviral vector-based strategies against infectious disease and cancer. *Hum Vaccin*  
574 *Immunother.* 2016 02;12(8):2064–74. doi: 10.1080/21645515.2016.1165908
- 575 22. Jönsson F, Kreppel F. Barriers to systemic application of virus-based vectors in gene therapy: lessons  
576 from adenovirus type 5. *Virus Genes.* 2017 Oct;53(5):692–9. doi: 10.1007/s11262-017-1498-z



- 577 23. Kumar RK, Foster PS, Rosenberg HF. Respiratory viral infection, epithelial cytokines, and innate  
578 lymphoid cells in asthma exacerbations. *J Leukoc Biol.* 2014 Sep;96(3):391–6. doi: 10.1189/jlb.3RI0314-  
579 129R
- 580 24. Gregory SM, Nazir SA, Metcalf JP. Implications of the innate immune response to adenovirus and  
581 adenoviral vectors. *Future Virol.* 2011 Mar;6(3):357–74. doi: 10.2217/fvl.11.6
- 582 25. Tran TTP, Tran TH, Kremer EJ. IgG-Complexed Adenoviruses Induce Human Plasmacytoid Dendritic  
583 Cell Activation and Apoptosis. *Viruses.* 2021 Aug 27;13(9):1699. doi: 10.3390/v13091699
- 584 26. Chéneau C, Eichholz K, Tran TH, Tran TTP, Paris O, Henriquet C, et al. Lactoferrin Retargets Human  
585 Adenoviruses to TLR4 to Induce an Abortive NLRP3-Associated Pyroptotic Response in Human  
586 Phagocytes. *Front Immunol.* 2021 May 20;12:685218. doi: 10.3389/fimmu.2021.685218
- 587 27. Eichholz K, Tran TH, Chéneau C, Tran TTP, Paris O, Pugnieri M, et al. Adenovirus- $\alpha$ -Defensin  
588 Complexes Induce NLRP3-Associated Maturation of Human Phagocytes via Toll-Like Receptor 4  
589 Engagement. Banks L, editor. *J Virol.* 2022 Mar 23;96(6):e01850-21. doi: 10.1128/jvi.01850-21
- 590 28. Chéneau C, Kremer EJ. Adenovirus—Extracellular Protein Interactions and Their Impact on Innate  
591 Immune Responses by Human Mononuclear Phagocytes. *Viruses.* 2020 Nov 26;12(12):1351. doi:  
592 10.3390/v12121351
- 593 29. Lopez-Lastra S, Masse-Ranson G, Fiquet O, Darche S, Serafini N, Li Y, et al. A functional DC cross talk  
594 promotes human ILC homeostasis in humanized mice. *Blood Adv.* 2017 Apr 11;1(10):601–14. doi:  
595 10.1182/bloodadvances.2017004358
- 596 30. Roy S, Jaeson MI, Li Z, Mahboob S, Jackson RJ, Grubor-Bauk B, et al. Viral vector and route of  
597 administration determine the ILC and DC profiles responsible for downstream vaccine-specific immune  
598 outcomes. *Vaccine.* 2019 Feb 28;37(10):1266–76. doi: 10.1016/j.vaccine.2019.01.045
- 599 31. Parronchi P, Carli MD, Manetti R, Simonelli C, Sampognaro S, Piccinni MP, et al. IL-4 and IFN ( $\alpha$ )  
600 and ( $\gamma$ ) exert opposite regulatory effects on the development of cytolytic potential by Th1 or Th2  
601 human T cell clones. *J Immunol.* 1992 Nov 1;149(9):2977–83.
- 602 32. Perreau M, Kremer EJ. Frequency, proliferation, and activation of human memory T cells induced by a  
603 nonhuman adenovirus. *J Virol.* 2005 Dec;79(23):14595–605. doi: 10.1128/JVI.79.23.14595-14605.2005
- 604 33. Tran TTP, Eichholz K, Amelio P, Moyer C, Nemerow GR, Perreau M, et al. Humoral immune response to  
605 adenovirus induce tolerogenic bystander dendritic cells that promote generation of regulatory T cells.  
606 Hearing P, editor. *PLoS Pathog.* 2018 Aug 20;14(8):e1007127. doi: 10.1371/journal.ppat.1007127
- 607 34. Eichholz K, Bru T, Tran TTP, Fernandes P, Welles H, Mennechet FJD, et al. Immune-Complexed  
608 Adenovirus Induce AIM2-Mediated Pyroptosis in Human Dendritic Cells. *PLoS Pathog.*  
609 2016;12(9):e1005871. doi: 10.1371/journal.ppat.1005871
- 610 35. Loustalot F, Kremer EJ, Salinas S. Membrane Dynamics and Signaling of the Coxsackievirus and  
611 Adenovirus Receptor. *Int Rev Cell Mol Biol.* 2016;322:331–62. doi: 10.1016/bs.ircmb.2015.10.006
- 612 36. Bergelson JM, Cunningham JA, Droguett G, Kurt-Jones EA, Krithivas A, Hong JS, et al. Isolation of a  
613 Common Receptor for Coxsackie B Viruses and Adenoviruses 2 and 5. *Science.* 1997 Feb  
614 28;275(5304):1320–3. doi: 10.1126/science.275.5304.1320
- 615 37. Maguire CA, Sapinoro R, Girgis N, Rodriguez-Colon SM, Ramirez SH, Williams J, et al. Recombinant  
616 Adenovirus Type 5 Vectors That Target DC-SIGN, ChemR23 and  $\alpha\beta$ 3 Integrin Efficiently Transduce  
617 Human Dendritic Cells and Enhance Presentation of Vectored Antigens. *Vaccine.* 2006 Jan  
618 30;24(5):671–82. doi: 10.1016/j.vaccine.2005.08.038
- 619 38. Adams WC, Bond E, Havenga MJE, Holterman L, Goudsmit J, Karlsson Hedestam GB, et al. Adenovirus  
620 serotype 5 infects human dendritic cells via a coxsackievirus–adenovirus receptor-independent receptor  
621 pathway mediated by lactoferrin and DC-SIGN. *J Gen Virol.* 2009 Jul;90(Pt 7):1600–10. doi:  
622 10.1099/vir.0.008342-0
- 623 39. Korokhov N, de Grujil TD, Aldrich WA, Triozzi PL, Banerjee PT, Gillies SD, et al. High efficiency  
624 transduction of dendritic cells by adenoviral vectors targeted to DC-SIGN. *Cancer Biol Ther.* 2005  
625 Mar;4(3):289–94. doi: 10.4161/cbt.4.3.1499
- 626 40. Hong SS, Karayan L, Tournier J, Curiel DT, Boulanger PA. Adenovirus type 5 fiber knob binds to MHC  
627 class I  $\alpha$ 2 domain at the surface of human epithelial and B lymphoblastoid cells. *The EMBO Journal.*  
628 1997;16(9):2294–306.
- 629 41. Gaggar A, Shayakhmetov DM, Lieber A. CD46 is a cellular receptor for group B adenoviruses. *Nat Med.*  
630 2003 Nov;9(11):1408–12. doi: 10.1038/nm952

- 631 42. Koizumi N, Mizuguchi H, Kondoh M, Fujii M, Hayakawa T, Watanabe Y. Efficient Gene Transfer into  
632 Human Trophoblast Cells with Adenovirus Vector Containing Chimeric Type 5 and 35 Fiber Protein. *Biol*  
633 *Pharm Bull.* 2004;27(12):2046–8. doi: 10.1248/bpb.27.2046
- 634 43. Arnberg N. Adenovirus receptors: implications for tropism, treatment and targeting: Adenovirus receptors.  
635 *Rev Med Virol.* 2009 May;19(3):165–78. doi: 10.1002/rmv.612
- 636 44. Wang H, Li Z, Yumul R, Lara S, Hemminki A, Fender P, et al. Multimerization of Adenovirus Serotype 3  
637 Fiber Knob Domains Is Required for Efficient Binding of Virus to Desmoglein 2 and Subsequent Opening  
638 of Epithelial Junctions. *J Virol.* 2011 Jul 1;85(13):6390–402. doi: 10.1128/JVI.00514-11
- 639 45. Coughlan L, Kremer EJ, Shayakhmetov DM. Adenovirus-based vaccines—a platform for pandemic  
640 preparedness against emerging viral pathogens. *Mol Ther.* 2022 Jan;S152500162200034X. doi:  
641 10.1016/j.ymthe.2022.01.034
- 642 46. Bu W, Joyce MG, Nguyen H, Banh DV, Aguilar F, Tariq Z, et al. Immunization with Components of the  
643 Viral Fusion Apparatus Elicits Antibodies That Neutralize Epstein-Barr Virus in B Cells and Epithelial  
644 Cells. *Immunity.* 2019 May;50(5):1305-1316.e6. doi: 10.1016/j.immuni.2019.03.010
- 645 47. Snijder J, Ortego MS, Weidle C, Stuart AB, Gray MD, McElrath MJ, et al. An Antibody Targeting the  
646 Fusion Machinery Neutralizes Dual-Tropic Infection and Defines a Site of Vulnerability on Epstein-Barr  
647 Virus. *Immunity.* 2018 Apr;48(4):799-811.e9. doi: 10.1016/j.immuni.2018.03.026
- 648 48. Nimmerjahn F, Ravetch JV. Fcγ receptors as regulators of immune responses. *Nat Rev Immunol.* 2008  
649 Jan;8(1):34–47. doi: 10.1038/nri2206
- 650 49. Guillemins M, Bruhns P, Saeys Y, Hammad H, Lambrecht BN. The function of Fcγ receptors in dendritic  
651 cells and macrophages. *Nat Rev Immunol.* 2014 Feb;14(2):94–108. doi: 10.1038/nri3582
- 652 50. Perreau M, Pantaleo G, Kremer EJ. Activation of a dendritic cell-T cell axis by Ad5 immune complexes  
653 creates an improved environment for replication of HIV in T cells. *J Exp Med.* 2008 Nov 24;205(12):2717–  
654 25. doi: 10.1084/jem.20081786
- 655 51. Ouoba AR, Paris O, Adawaye C, Dzomo GT, Fouda AA, Kania D, et al. Prevalence of Neutralizing  
656 Antibodies against Adenoviruses types -C5, -D26 and -B35 used in vaccination platforms, in Healthy and  
657 HIV-Infected Adults and Children from Burkina Faso and Chad. 2022 Jun 7;2022.06.07.22276076. doi:  
658 10.1101/2022.06.07.22276076
- 659 52. Kotas ME, Locksley RM. Why Innate Lymphoid Cells? *Immunity.* 2018 Jun;48(6):1081–90. doi:  
660 10.1016/j.immuni.2018.06.002
- 661 53. Fan X, Rudensky AY. Hallmarks of Tissue-Resident Lymphocytes. *Cell.* 2016 Mar;164(6):1198–211. doi:  
662 10.1016/j.cell.2016.02.048
- 663 54. King CR, Zhang A, Mymryk JS. The Persistent Mystery of Adenovirus Persistence. *Trends in*  
664 *Microbiology.* 2016 May;24(5):323–4. doi: 10.1016/j.tim.2016.02.007
- 665 55. Martinez-Gonzalez I, Mathä L, Steer CA, Ghaedi M, Poon GFT, Takei F. Allergen-Experienced Group 2  
666 Innate Lymphoid Cells Acquire Memory-like Properties and Enhance Allergic Lung Inflammation.  
667 *Immunity.* 2016 Jul;45(1):198–208. doi: 10.1016/j.immuni.2016.06.017
- 668 56. Vivier E, Artis D, Colonna M, Diefenbach A, Di Santo JP, Eberl G, et al. Innate Lymphoid Cells: 10 Years  
669 *On. Cell.* 2018 23;174(5):1054–66. doi: 10.1016/j.cell.2018.07.017
- 670 57. Tanaka T, Narazaki M, Masuda K, Kishimoto T. Regulation of IL-6 in Immunity and Diseases. *Adv Exp*  
671 *Med Biol.* 2016;941:79–88. doi: 10.1007/978-94-024-0921-5\_4
- 672 58. Kimura A, Kishimoto T. IL-6: regulator of Treg/Th17 balance. *Eur J Immunol.* 2010 Jul;40(7):1830–5. doi:  
673 10.1002/eji.201040391
- 674 59. Elsaesser H, Sauer K, Brooks DG. IL-21 is required to control chronic viral infection. *Science.* 2009 Jun  
675 19;324(5934):1569–72. doi: 10.1126/science.1174182
- 676 60. Parmigiani A, Pallin MF, Schmidtmayerova H, Lichtenheld MG, Pahwa S. Interleukin-21 and cellular  
677 activation concurrently induce potent cytotoxic function and promote antiviral activity in human CD8 T  
678 cells. *Hum Immunol.* 2011 Feb;72(2):115–23. doi: 10.1016/j.humimm.2010.10.015
- 679 61. Lim AI, Di Santo JP. ILC-poiesis: Ensuring tissue ILC differentiation at the right place and time. *Eur J*  
680 *Immunol.* 2019;49(1):11–8. doi: 10.1002/eji.201747294
- 681 62. Yang J, Richmond A. The angiostatic activity of interferon-inducible protein-10/CXCL10 in human  
682 melanoma depends on binding to CXCR3 but not to glycosaminoglycan. *Mol Ther.* 2004 Jun;9(6):846–  
683 55. doi: 10.1016/j.ymthe.2004.01.010

- 684 63. Liu M, Guo S, Hibbert JM, Jain V, Singh N, Wilson NO, et al. CXCL10/IP-10 in infectious diseases  
685 pathogenesis and potential therapeutic implications. *Cytokine Growth Factor Rev.* 2011 Jun;22(3):121–  
686 30. doi: 10.1016/j.cytogfr.2011.06.001
- 687 64. Pandya JM, Lundell A-C, Andersson K, Nordström I, Theander E, Rudin A. Blood chemokine profile in  
688 untreated early rheumatoid arthritis: CXCL10 as a disease activity marker. *Arthritis Res Ther.* 2017 Feb  
689 2;19(1):20. doi: 10.1186/s13075-017-1224-1
- 690 65. Spurrell JCL, Wiehler S, Zaheer RS, Sanders SP, Proud D. Human airway epithelial cells produce IP-10  
691 (CXCL10) in vitro and in vivo upon rhinovirus infection. *Am J Physiol Lung Cell Mol Physiol.* 2005  
692 Jul;289(1):L85-95. doi: 10.1152/ajplung.00397.2004
- 693 66. Hayney MS, Henriquez KM, Barnet JH, Ewers T, Champion HM, Flannery S, et al. Serum IFN- $\gamma$ -induced  
694 protein 10 (IP-10) as a biomarker for severity of acute respiratory infection in healthy adults. *J Clin Virol.*  
695 2017 May;90:32–7. doi: 10.1016/j.jcv.2017.03.003
- 696 67. Weaver EA, Barry MA. Low Seroprevalent Species D Adenovirus Vectors as Influenza Vaccines. Miyaji  
697 EN, editor. *PLoS ONE.* 2013 Aug 22;8(8):e73313. doi: 10.1371/journal.pone.0073313
- 698 68. Smith JG, Nemerow GR. Mechanism of adenovirus neutralization by Human alpha-defensins. *Cell Host*  
699 *Microbe.* 2008 Jan 17;3(1):11–9. doi: 10.1016/j.chom.2007.12.001
- 700 69. Kremer EJ, Boutin S, Chillon M, Danos O. Canine Adenovirus Vectors: an Alternative for Adenovirus-  
701 Mediated Gene Transfer. *J Virol.* 2000 Jan;74(1):505–12.
- 702 70. Valdez Y, Kyei SK, Poon GFT, Kokaji A, Woodside SM, Eaves AC, et al. Efficient Enrichment of  
703 Functional ILC Subsets from Human PBMC by Immunomagnetic Selection. *The Journal of Immunology.*  
704 2018 May 1;200(1 Supplement):51.13-51.13.
- 705 71. Kolegraff K, Nava P, Laur O, Parkos CA, Nusrat A. Characterization of full-length and proteolytic cleavage  
706 fragments of desmoglein-2 in native human colon and colonic epithelial cell lines. *Cell Adh Migr.*  
707 2011;5(4):306–14. doi: 10.4161/cam.5.4.16911

## 709 **Supporting information**

### 710 **S1 Fig. Enrichment, stability and characteristic of human ILCs**

711 ILCs were identified pre and post negative selection from PBMCs. **A)** Using total PBMCs,  
712 we gated on the CD45<sup>+</sup> population, and within this population, we gated on the Lin<sup>-</sup> and  
713 CD127<sup>+</sup> population. **B)** Within the CD127<sup>+</sup> population, we gated on CRTH2 and CD161  
714 high (ILC2) and low populations (not ILC2). In the not ILC2 population, we screened for  
715 CD117 to distinguish between ILC1 and ILC3 (NKp44<sup>-</sup> and NKp44<sup>+</sup>) populations. ILC1 are  
716 identified in fuchsia, ILC2 in light blue and ILC3 in green and dark blue. **C)** Characterization  
717 of ILC populations post-negative selection: 85% of the by CD45<sup>+</sup> cells were Lin<sup>-</sup>. Within the  
718 Lin<sup>-</sup> population, >90% were CD127<sup>+</sup>. **D)** Within the CD127<sup>+</sup> population 62%+ were CRTH2  
719 and CD161 high (ILC2). Within the CRTH2 and CD161 low population (not-ILC2s), ~86 %  
720 were ILC3s (NKp44<sup>-</sup> and NKp44<sup>+</sup>) and 14% were ILC1s. **E)** Quantification of the NK, NKT,  
721 T and B cells after negative selection. Lymphoid cells and granulocytes were screened with  
722 CD45. In parallel monocytes and macrophages were gated by CD4<sup>+</sup> and CD14<sup>+</sup>. From  
723 lymphoid cells, we screened for the presence of CD3 (LyT) and CD19 (LyB), then for CD20  
724 and CD19. Finally, we gated on CD56 and CD16 within lymphoid cells (NKT cells) and  
725 within lymphoid cells LyT excluded (NK cells). Summary of NK and NKT cells, LyT and LyB  
726 present post-enrichment. Results were obtained with the Navios flow cytometer (Beckman  
727 Coulter) and are representative of 3 donors.

### 728 **S2 Fig. Infection efficiency of human ILCs with HAdV-C5, -D26 and -B35**

729 GFP expression by ILCs was measured 24 h post-challenge with each HAdV vector for  
730 ILC1, ILC2 and ILC3 (n = 16). The mean percentages of cells expressing GFP after infection  
731 were for ILC1: HAdV-C5: 18% / HAdV-D26: 12.5% / HAdV-B35: 23% **(A)**; for ILC2: HAdV-  
732 C5: 25% / HAdV-D26: 19% / HAdV-B35: 24% **(B)**; for ILC3: HAdV-C5: 14% / HAdV-D26:  
733 14% / HAdV-B35: 16% **(C)**. Statistics were performed by paired Student's t test by  
734 comparison with uninfected cells and between different HAdV (ns, p > 0.05, \* p ≤ 0.05, \*\* p

735  $\leq 0.01$ , \*\*\*  $p \leq 0.001$ ). We noted a significant difference between HAdV-C5 and -D26 and  
736 then HAdV-D26 and -B35 for ILC2 (\*  $p \leq 0.05$ ), but a non-significant difference between the  
737 HAdVs tested for ILC1 and ILC3.

738 **S3 Fig. Median Fluorescence Intensity (MFI) and gMFI of the expression of candidate**  
739 **receptors for HAdVs by human peripheral blood ILCs**

740 MFI and gMFI for HLA-ABC<sup>+/-</sup> (A), CD46<sup>+/-</sup> and CD49d<sup>+/-</sup> (B) cells for each ILC subset and  
741 the fold changes were shown for a representative donor. The MFI of 10 (red) correspond to  
742 the minimum of fluorescent measured.

743 **S4 Fig. Activation and co-stimulatory molecule levels in human ILCs**

744 Levels of CD80 (A), CD86 (B) and MHC-II (HLA-DR) (C) in freshly isolated total ILCs, ILC1,  
745 ILC2 and ILC3. Cell populations were normalized to 100%. Results were obtained with the  
746 NovoCyte® flow cytometer and analyzed with NovoExpress software. Due to high donor  
747 variation, the results presented represent only one donor among the 3 tested (CD80 and  
748 CD86).

749 **S5 Fig. ILC uptake of HAdVs in the presence of NAbs**

750 **A-C)** GFP expression by ILC1, ILC2 and ILC3 was measured 24 h post-challenge with  
751 HAdV-C5-SE (A), -D26-SA (B), or -B35-S14 (C) ( $n \geq 5$ ). Sera E, A, and 14 have NAbs  
752 against HAdV-C5, -D26, and -B35, respectively. **D)** MFI and gMFI for GFP<sup>+</sup> and GFP<sup>-</sup> cells  
753 for each ILC subset and the fold changes for the mean of 2 representative donors were  
754 presented. Statistical analyses by paired Student's t test were performed by comparison  
755 between ILC subsets for each Ig-HAdVs complexes (ns,  $p > 0.05$ , \*  $p \leq 0.05$ , \*\*  $p \leq 0.01$ ,  
756 \*\*\*  $p \leq 0.001$ ). **E)** Summary of the impact of NAbs on ILC uptake of HAdV-C5, -D26 and -  
757 B35.

758 **S6 Fig. Level of Toll-like receptors by human ILCs directly isolated from peripheral**  
759 **blood**

760 **A)** TLR2 levels by total ILCs, ILC1, ILC2, and ILC3; **B)** TLR4 levels by total ILCs, ILC1,  
761 ILC2, and ILC3. Cell populations were normalized to 100%. Results are representative of  
762 2-5 donors. **C)** Cytokine profile secreted by ILCs after incubation with (LPS) or without  
763 (ILCs) LPS for T helper cytokines panels using CBA. Data are representative of one donor.

764 **S7 Fig. Identification of ILCs and HAdVs uptake in the presence of HDP**

765 **A-C)** ILCs are among CD3<sup>-</sup>/CD127<sup>+</sup> lymphoid cells; **D)** GFP levels by ILCs were measured  
766 24 h post-challenge with each HAdV ± HDP (HNP-1 or lactoferrin) for total ILCs.

767 **S8 Fig. Bystander effect on ILC maturation: IL-8 levels**

768 IL-8 secretion by human total ILCs was assessed 24 h after indirect challenge by moDCs  
769 for each HAdV ± NAbs (n = 3).

770 **S9 Fig. Summary tables of infection and activation/stimulation of ILCs by HAdVs or**  
771 **infected moDCs in the presence or absence of NAbs**

772 **A)** Infection capacity of ILCs by HAdVs. **B)** Level of the CD69 marker by ILCs. **C)** Secretion  
773 of cytokines by ILCs. **D)** GFP and CD86 levels by DCs after HAdVs challenge. **E)** CD69  
774 level by ILCs after indirect challenge by moDCs. **F)** Secretion of cytokines by ILC after  
775 indirect challenge by moDCs. Only cytokines with a secretion level at least 2-fold higher  
776 than controls were shown. *IC for Ig – HAdVs complexes.*



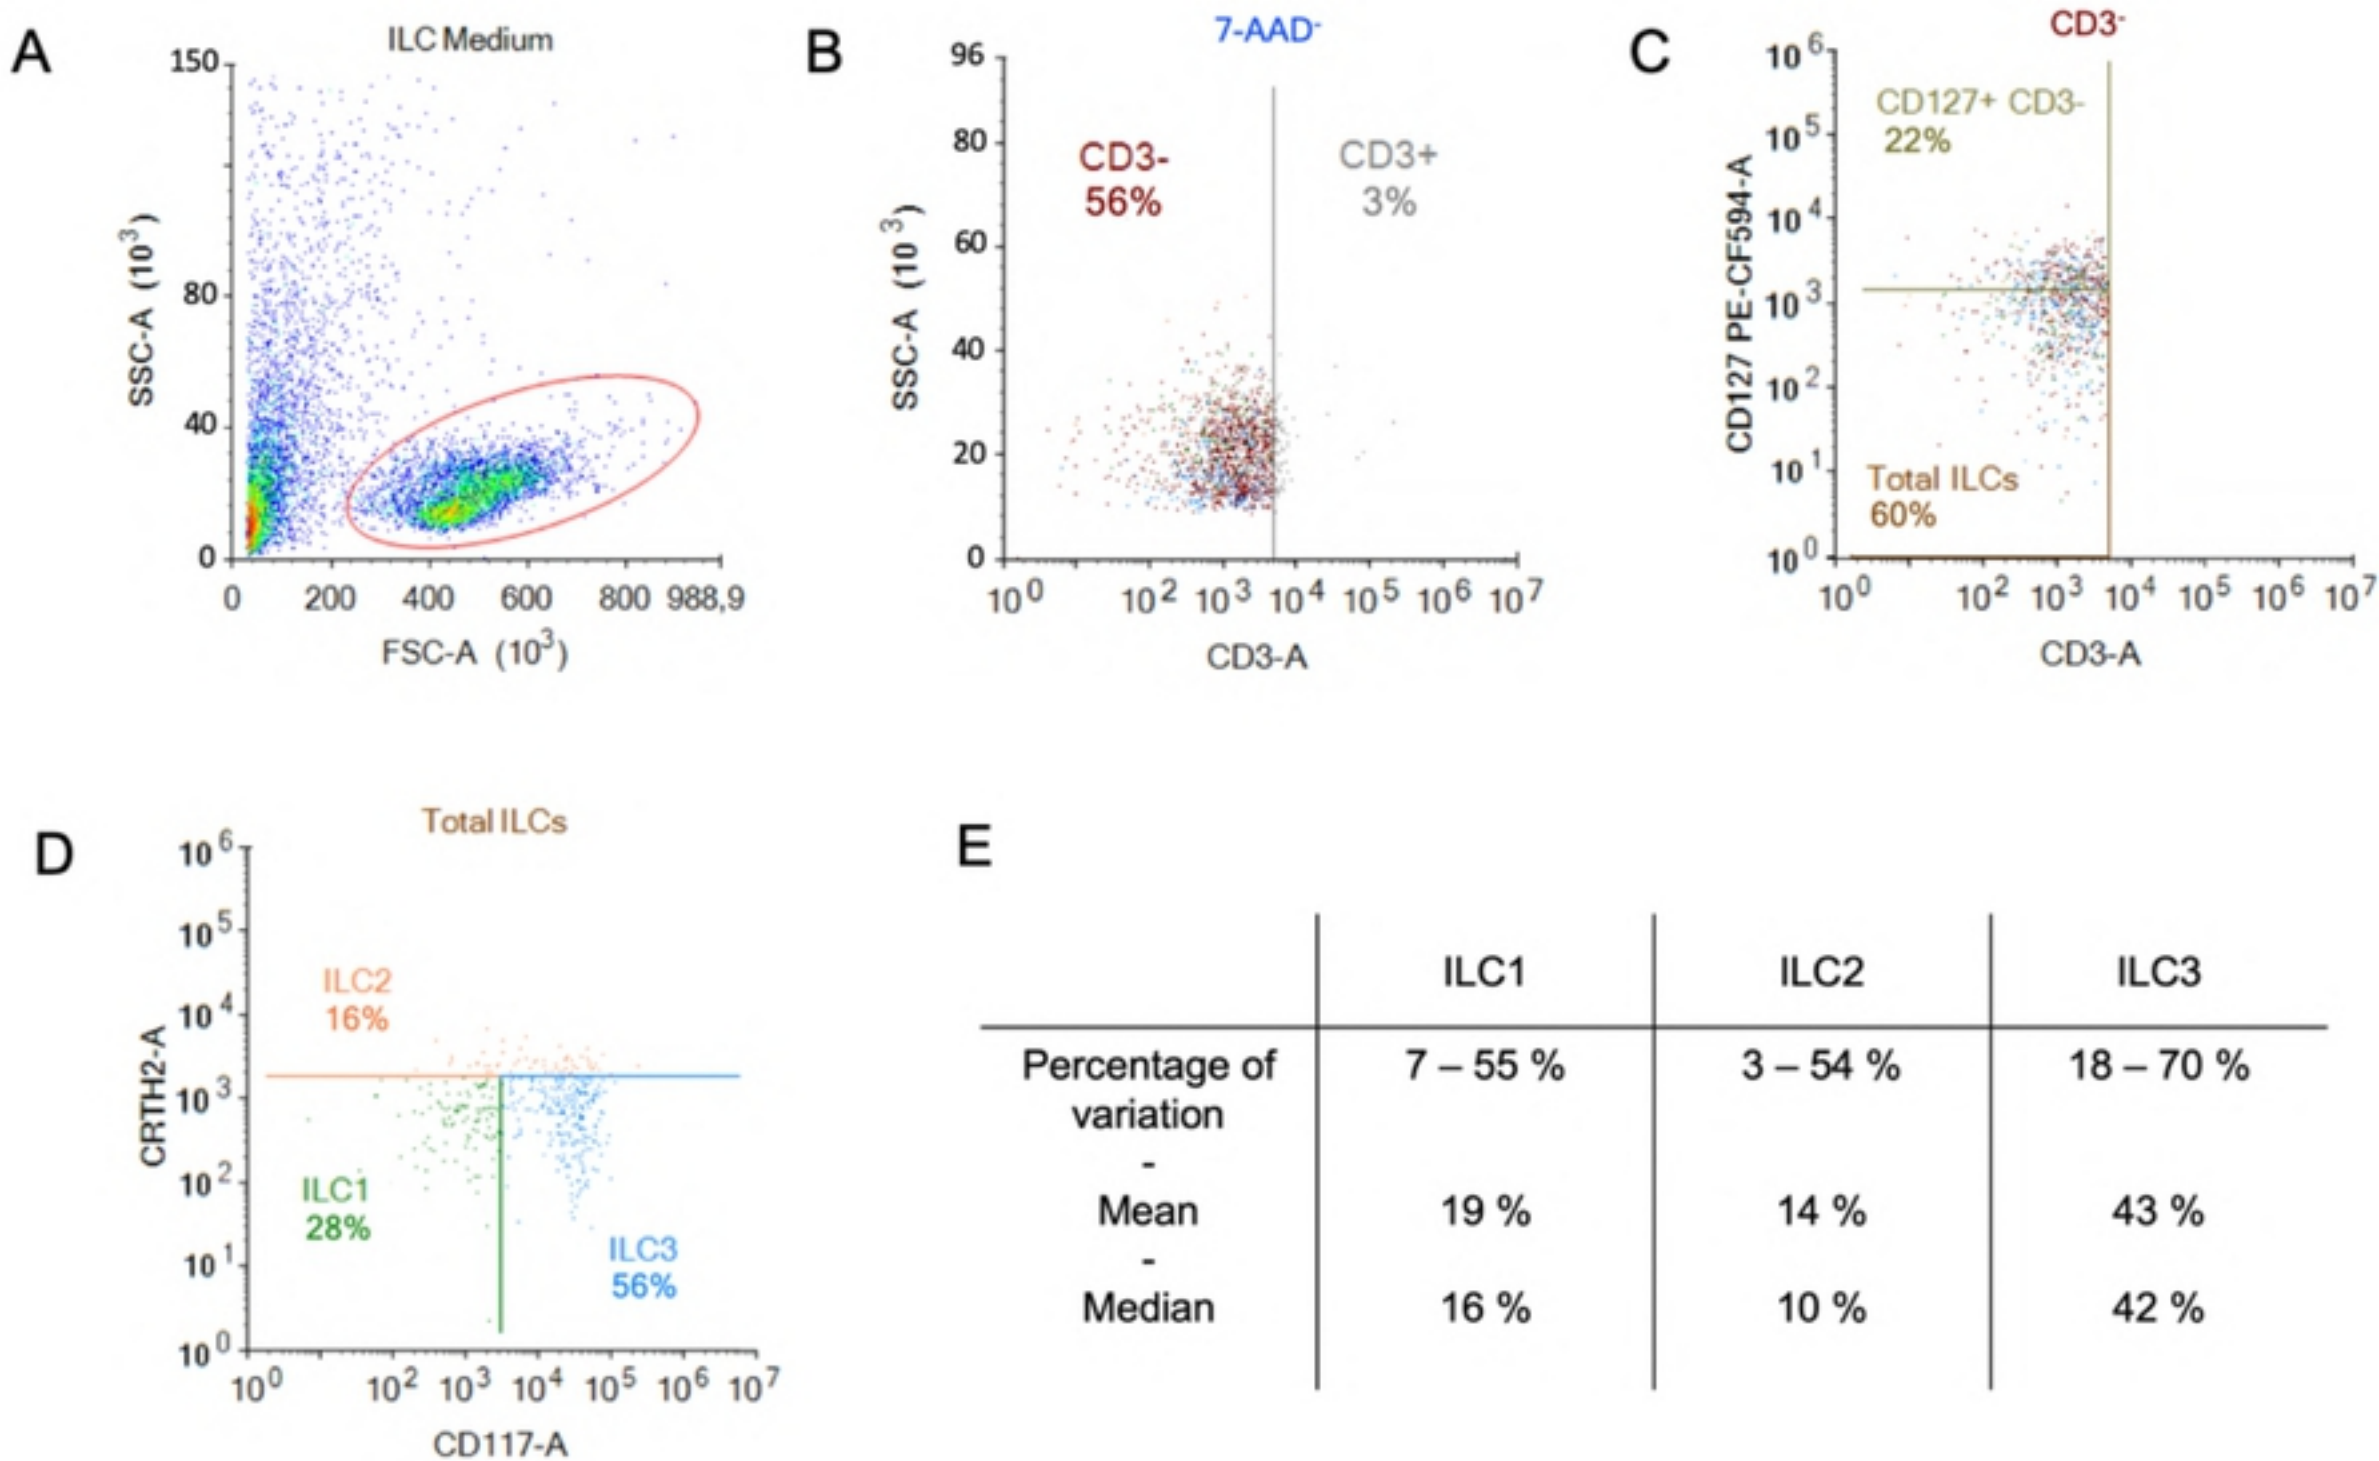

Figure 1

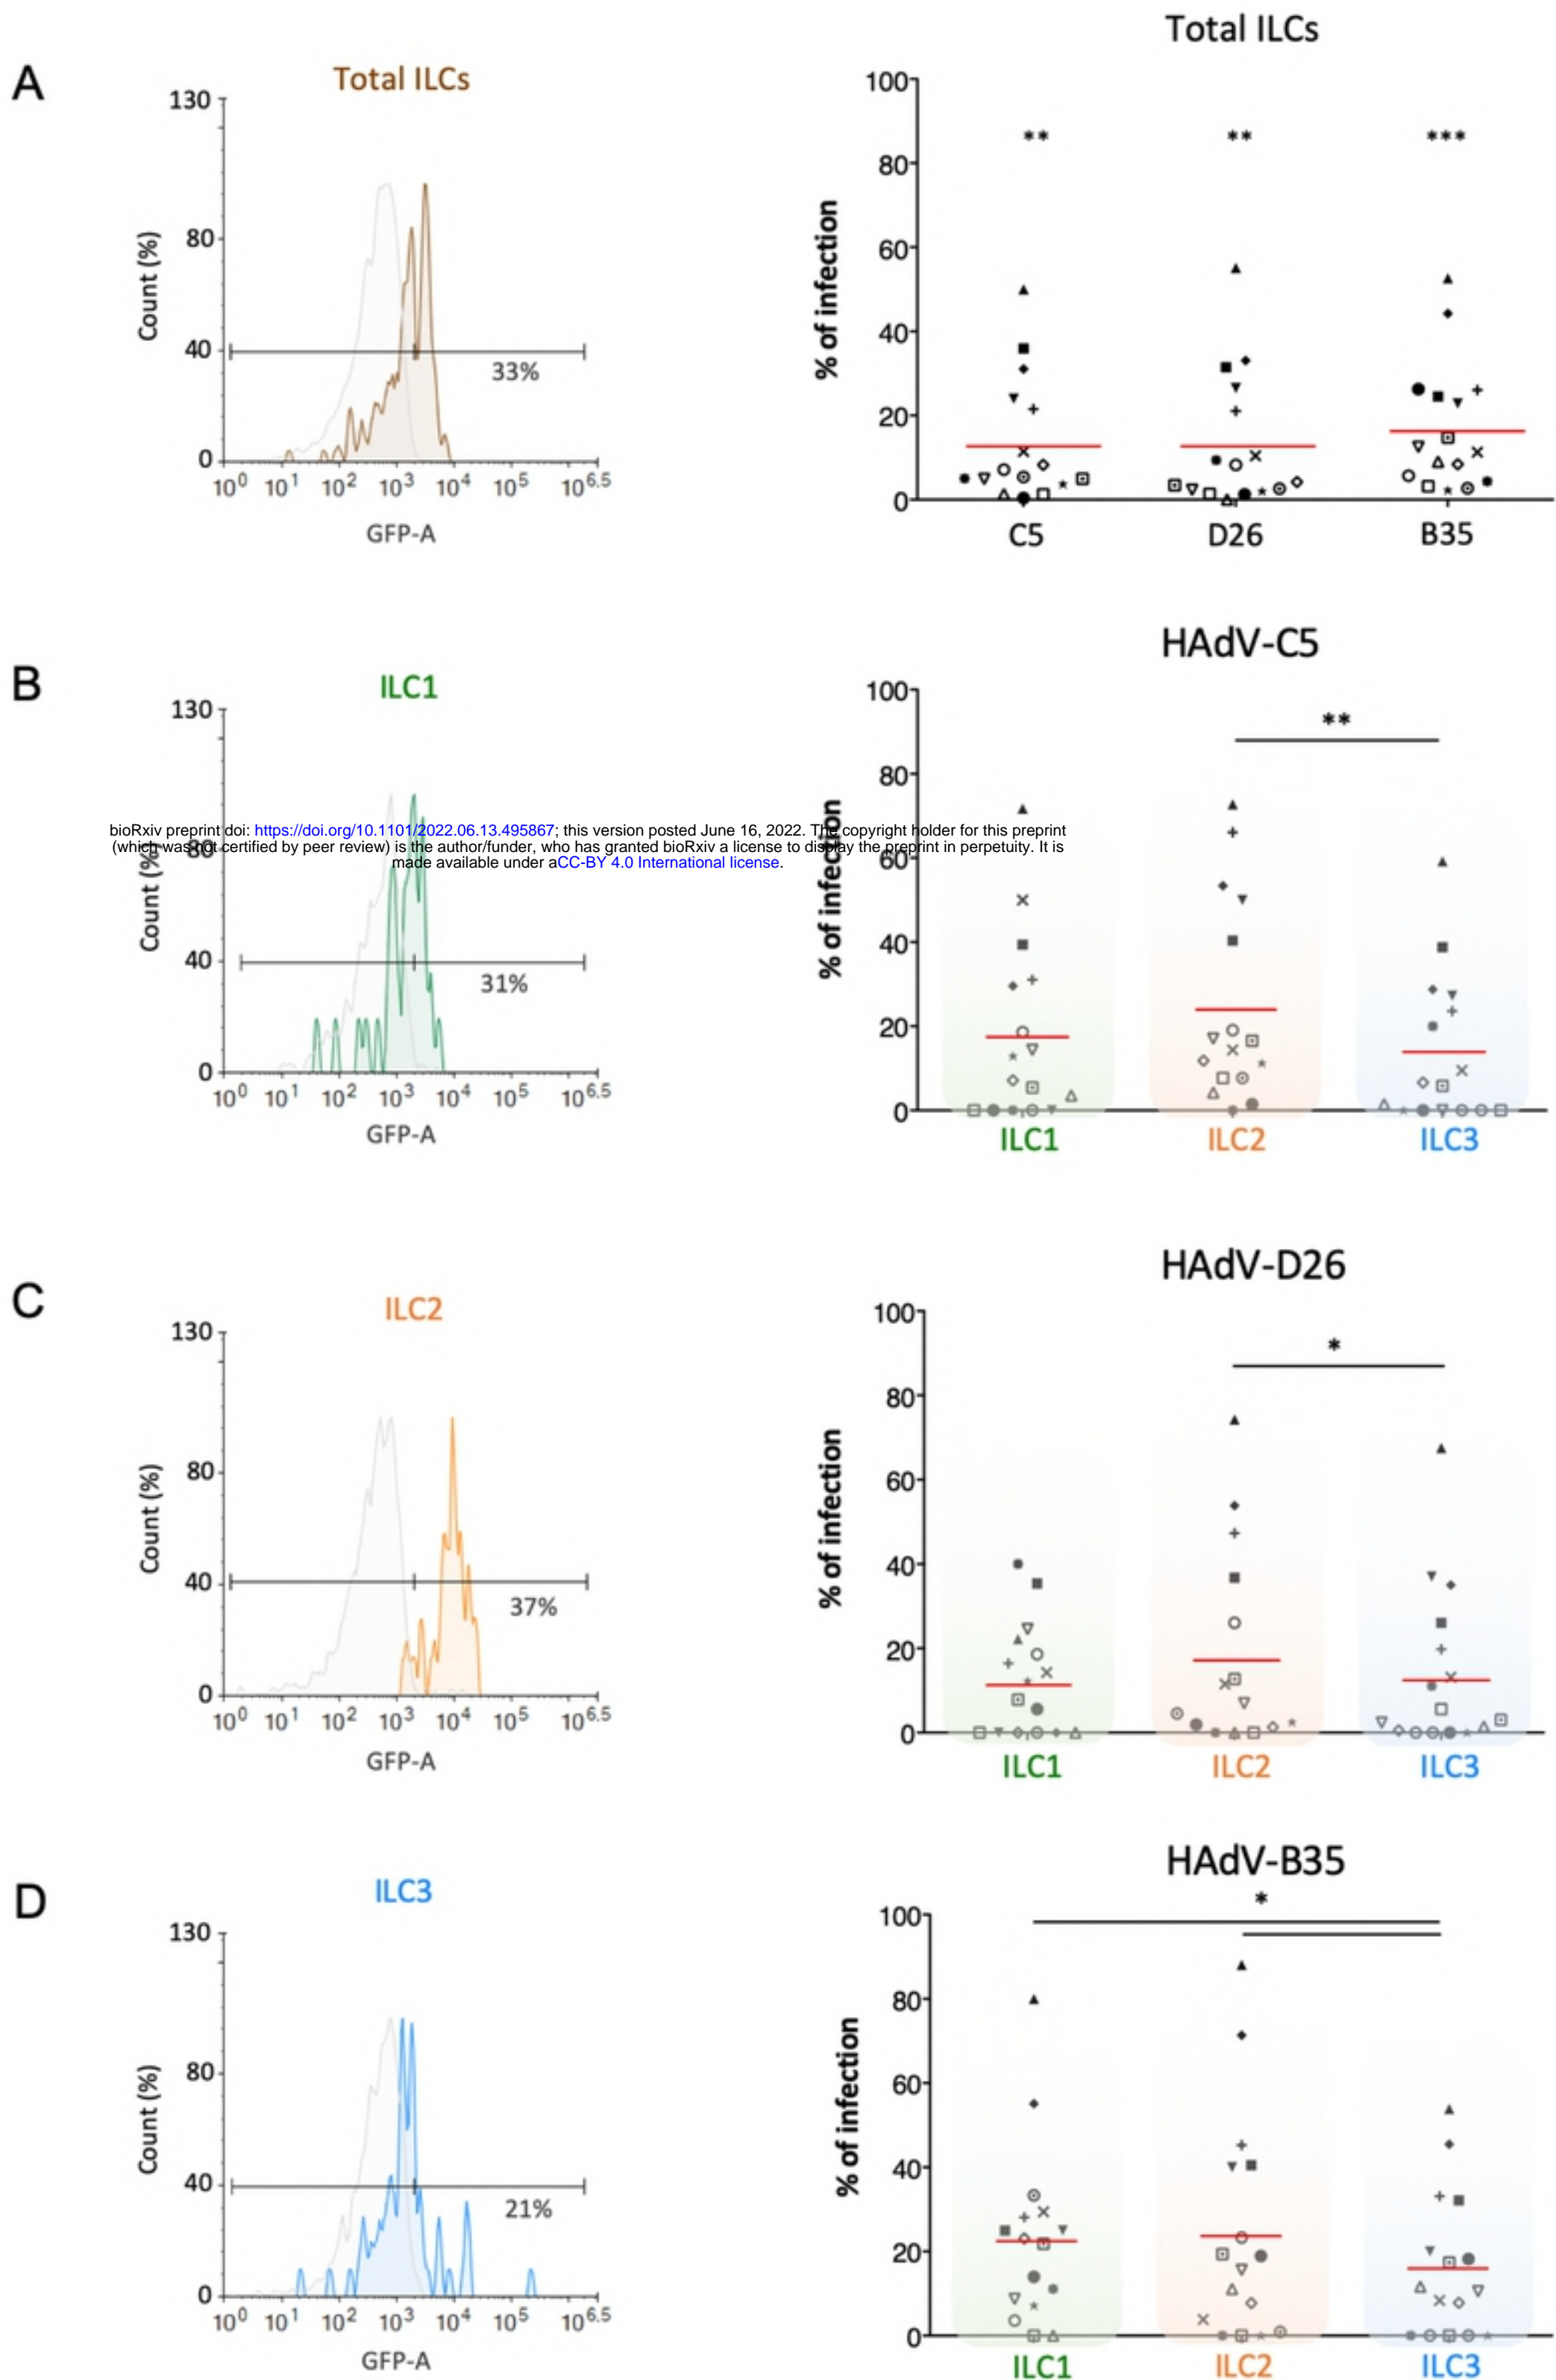

Figure 2



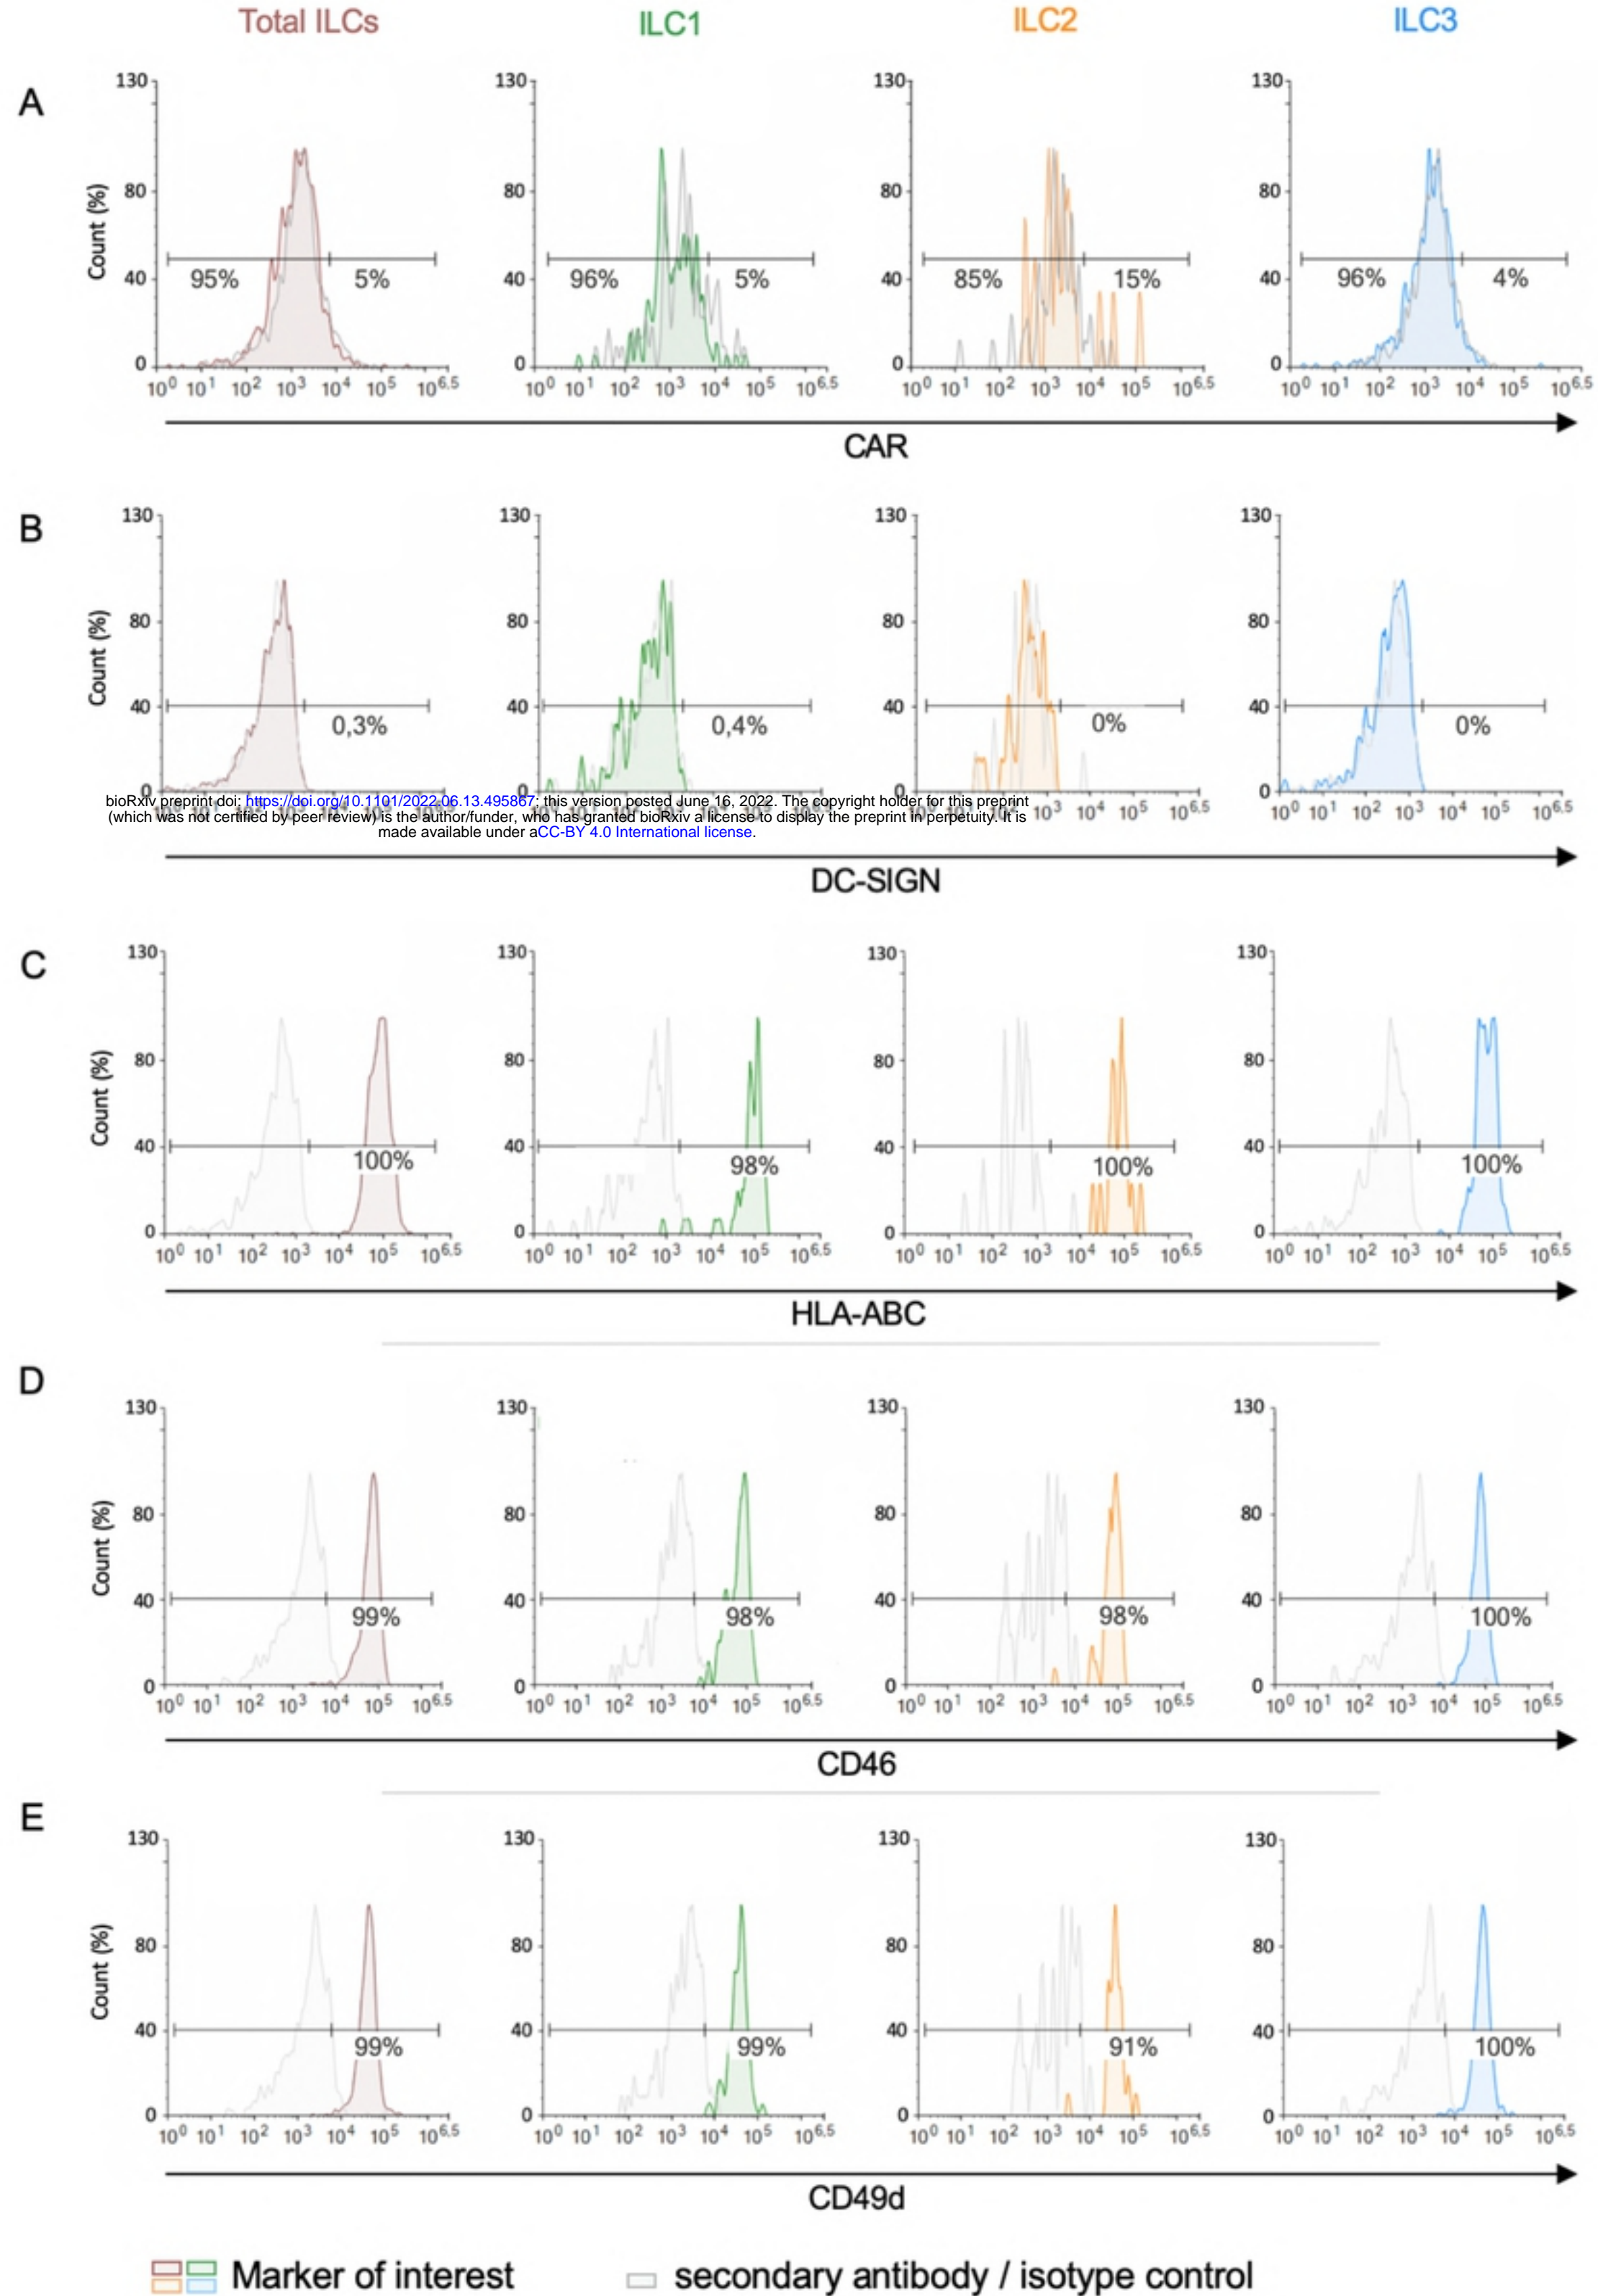

Figure 3

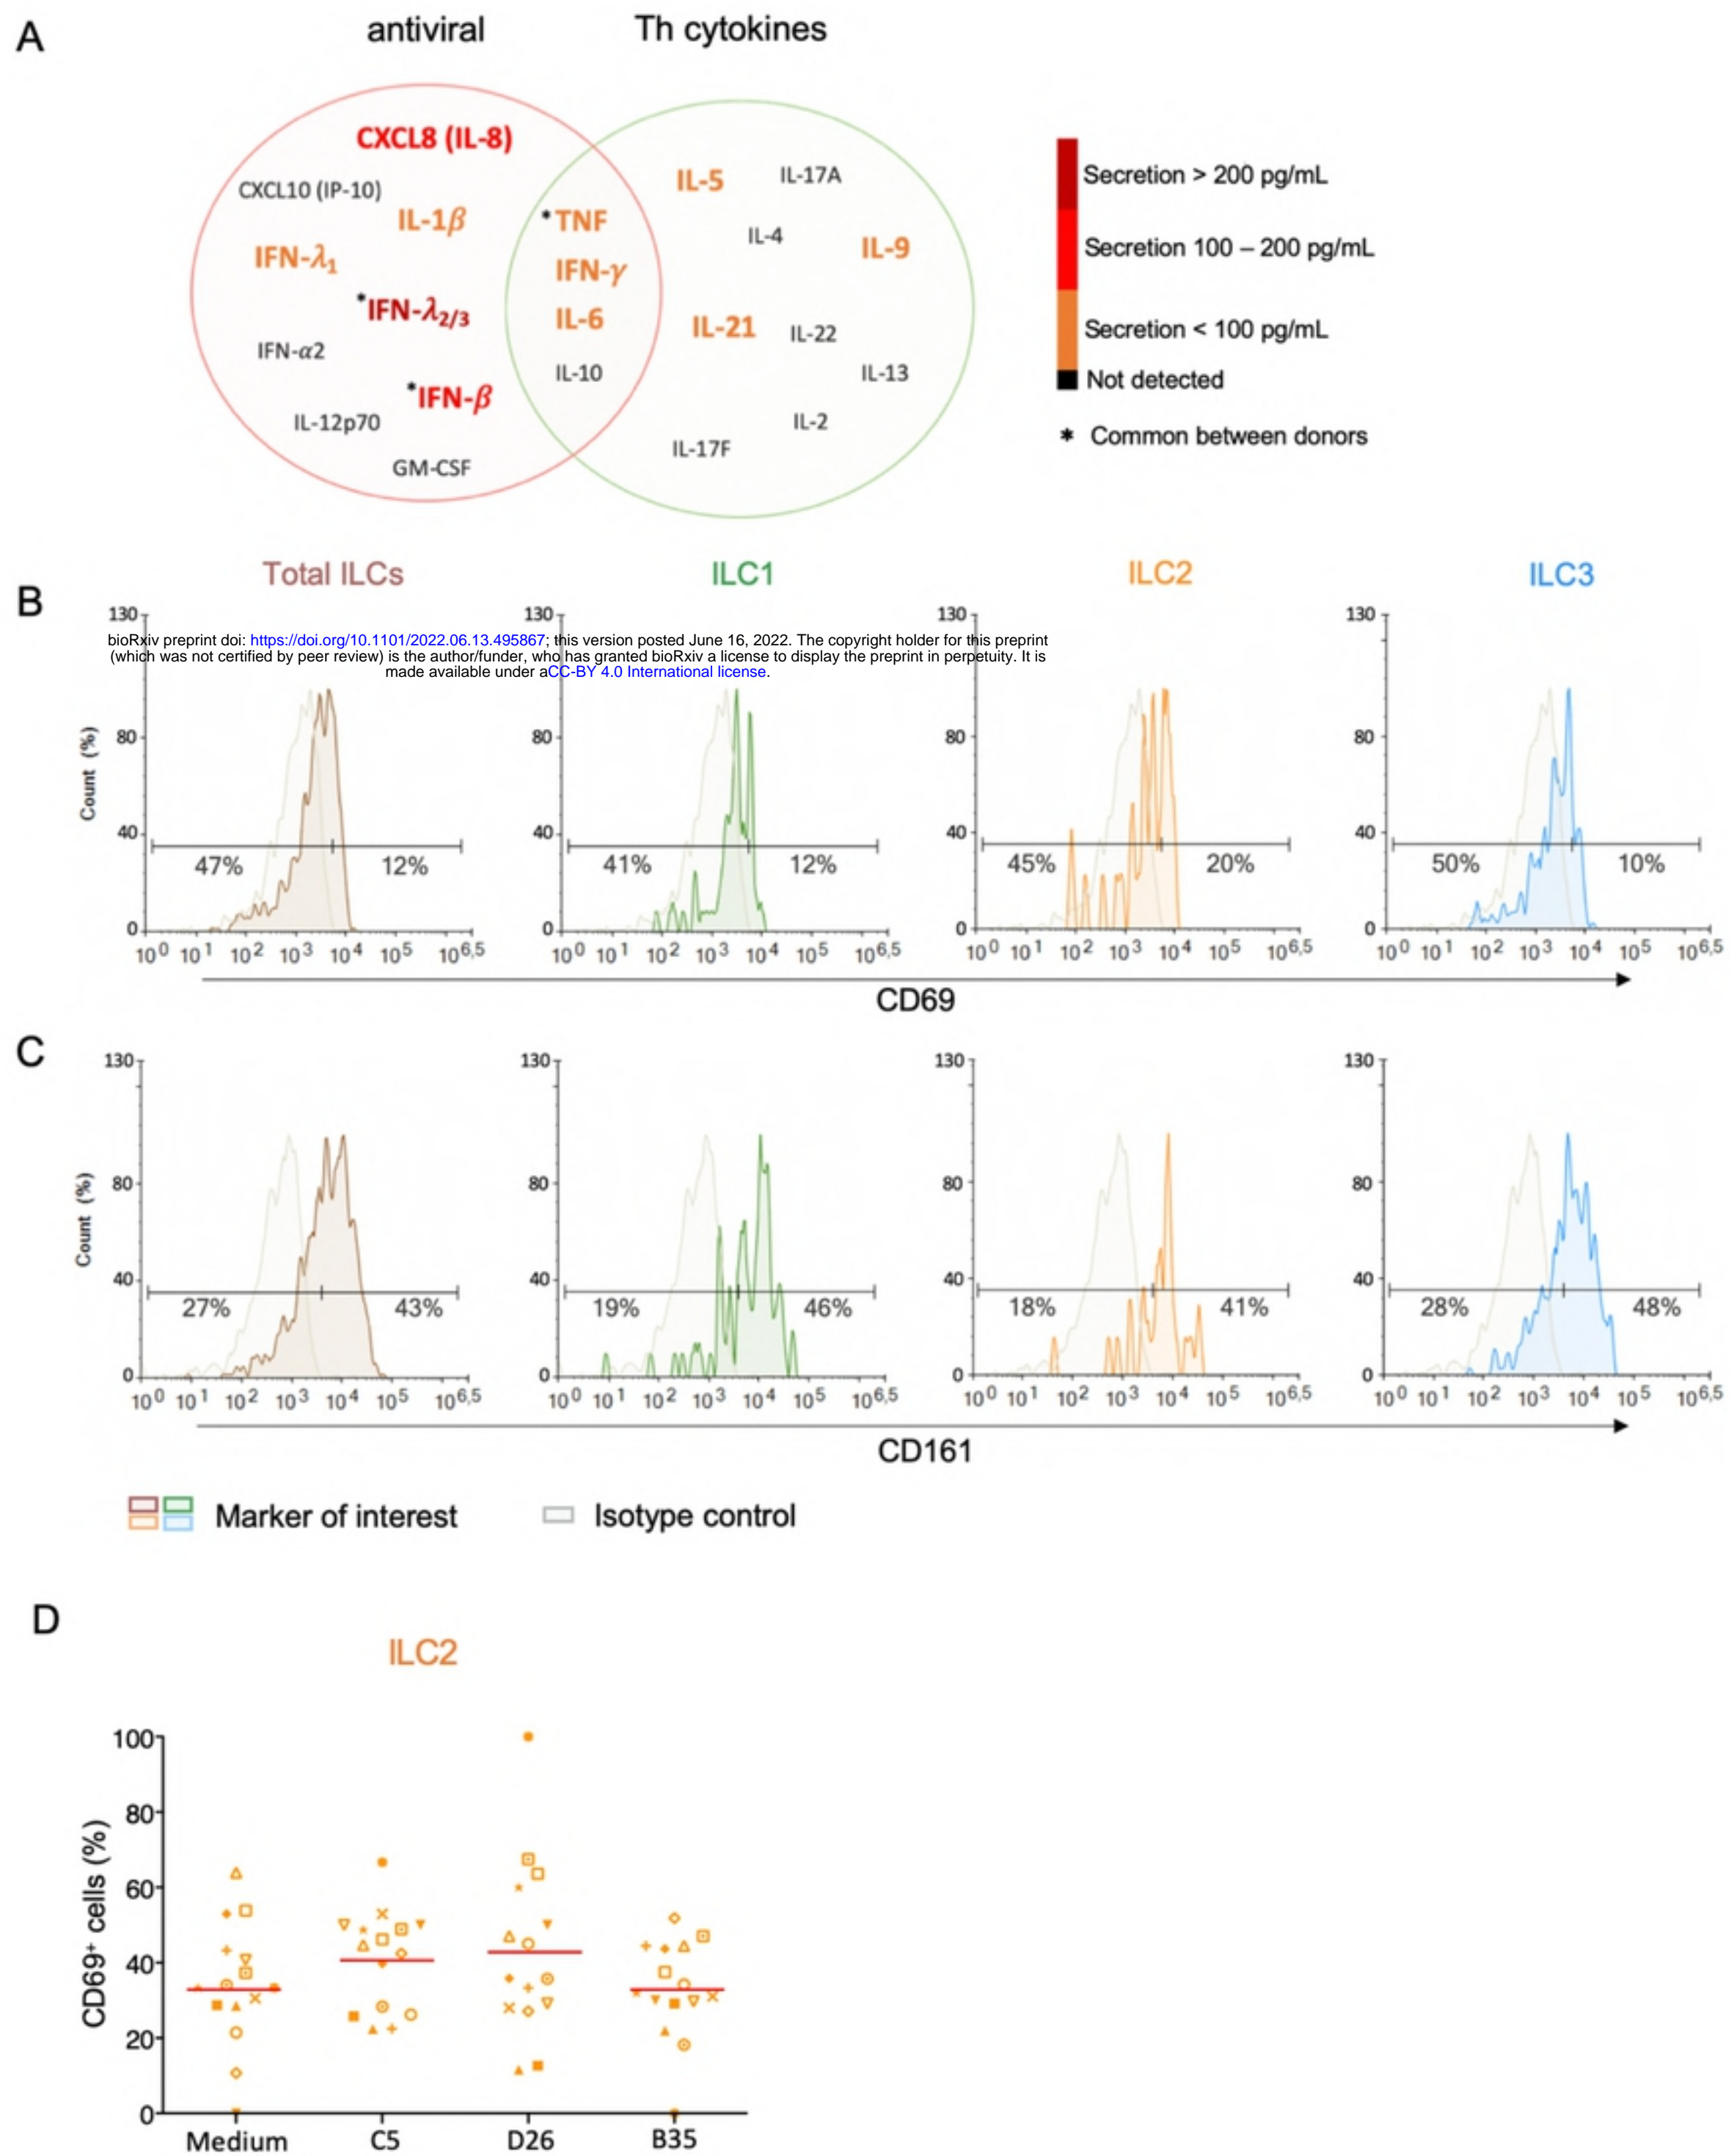

Figure 4



# Total ILCs

bioRxiv preprint doi: <https://doi.org/10.1101/2022.06.13.495867>; this version posted June 16, 2022. The copyright holder for this preprint (which was not certified by peer review) is the author/funder, who has granted bioRxiv a license to display the preprint in perpetuity. It is made available under aCC-BY 4.0 International license.

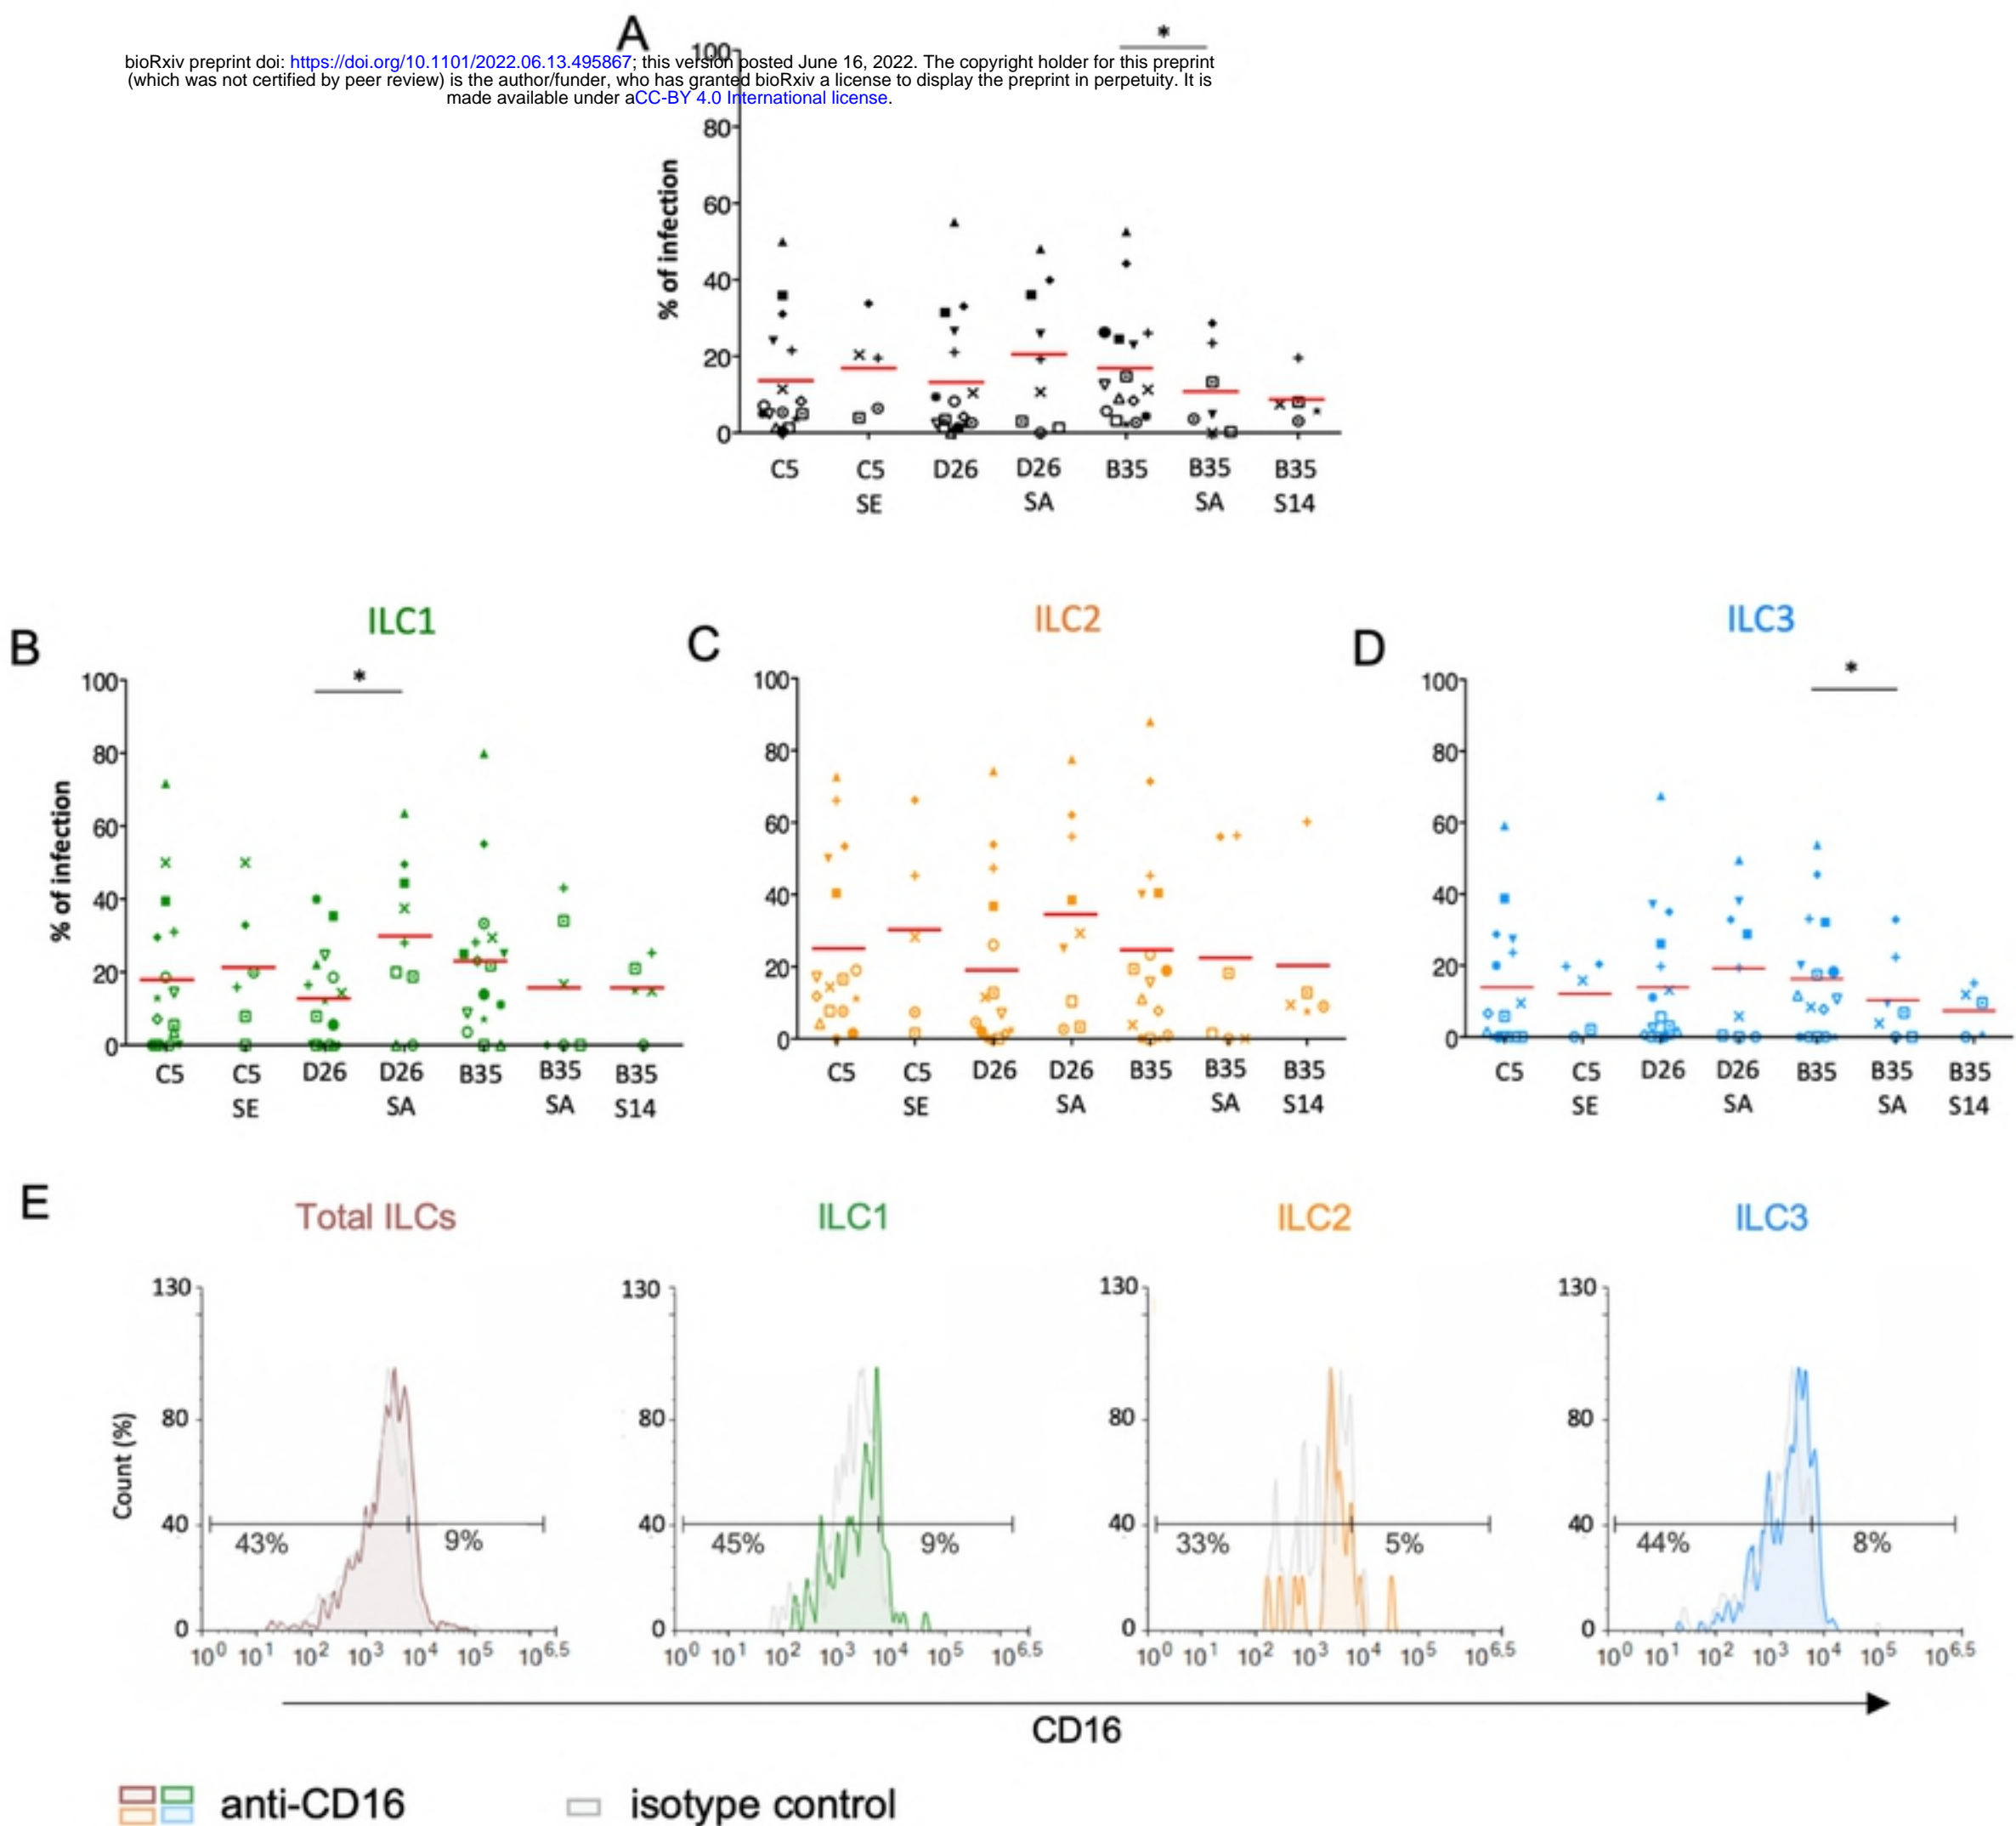

Figure 5

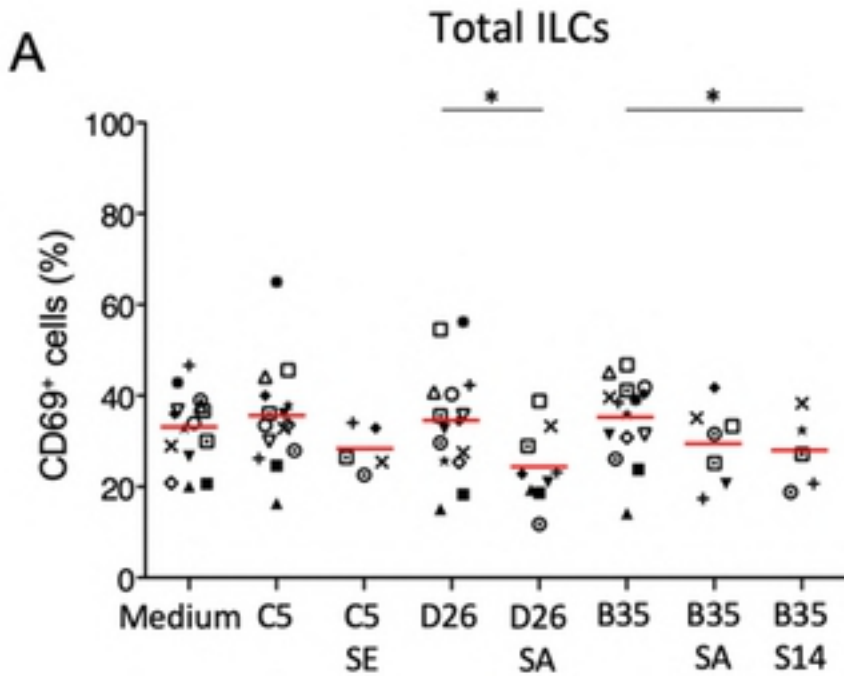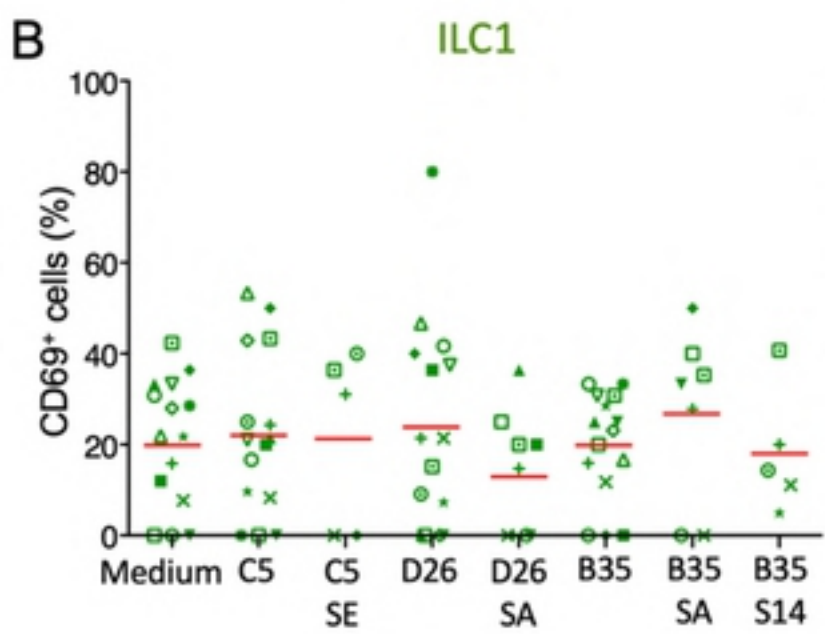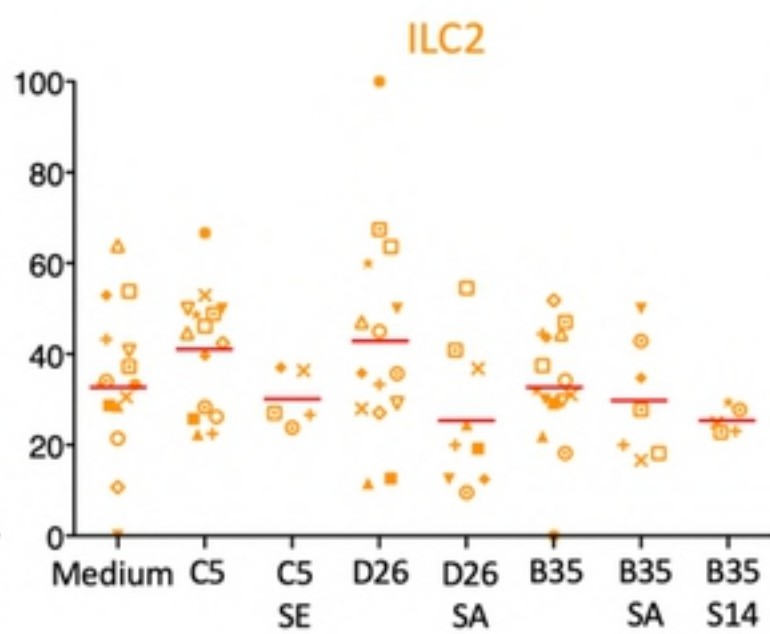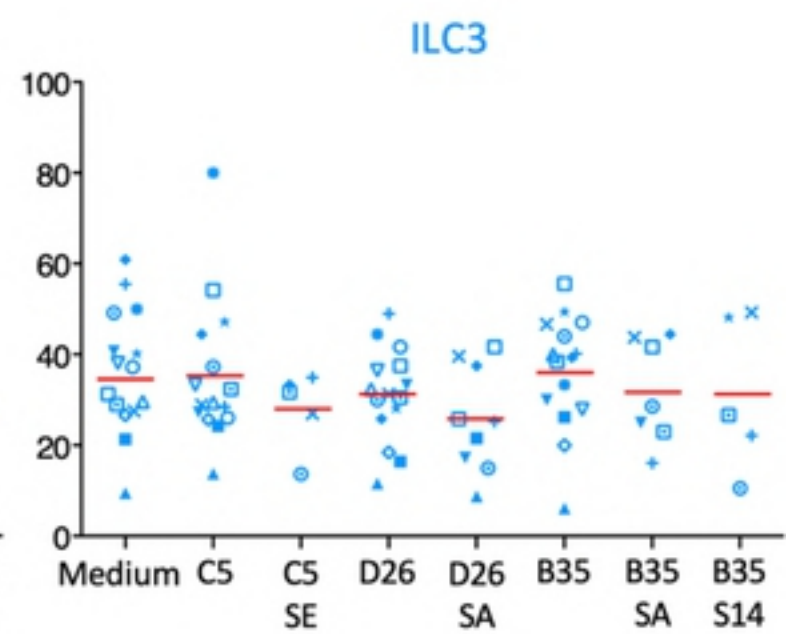

Figure 6

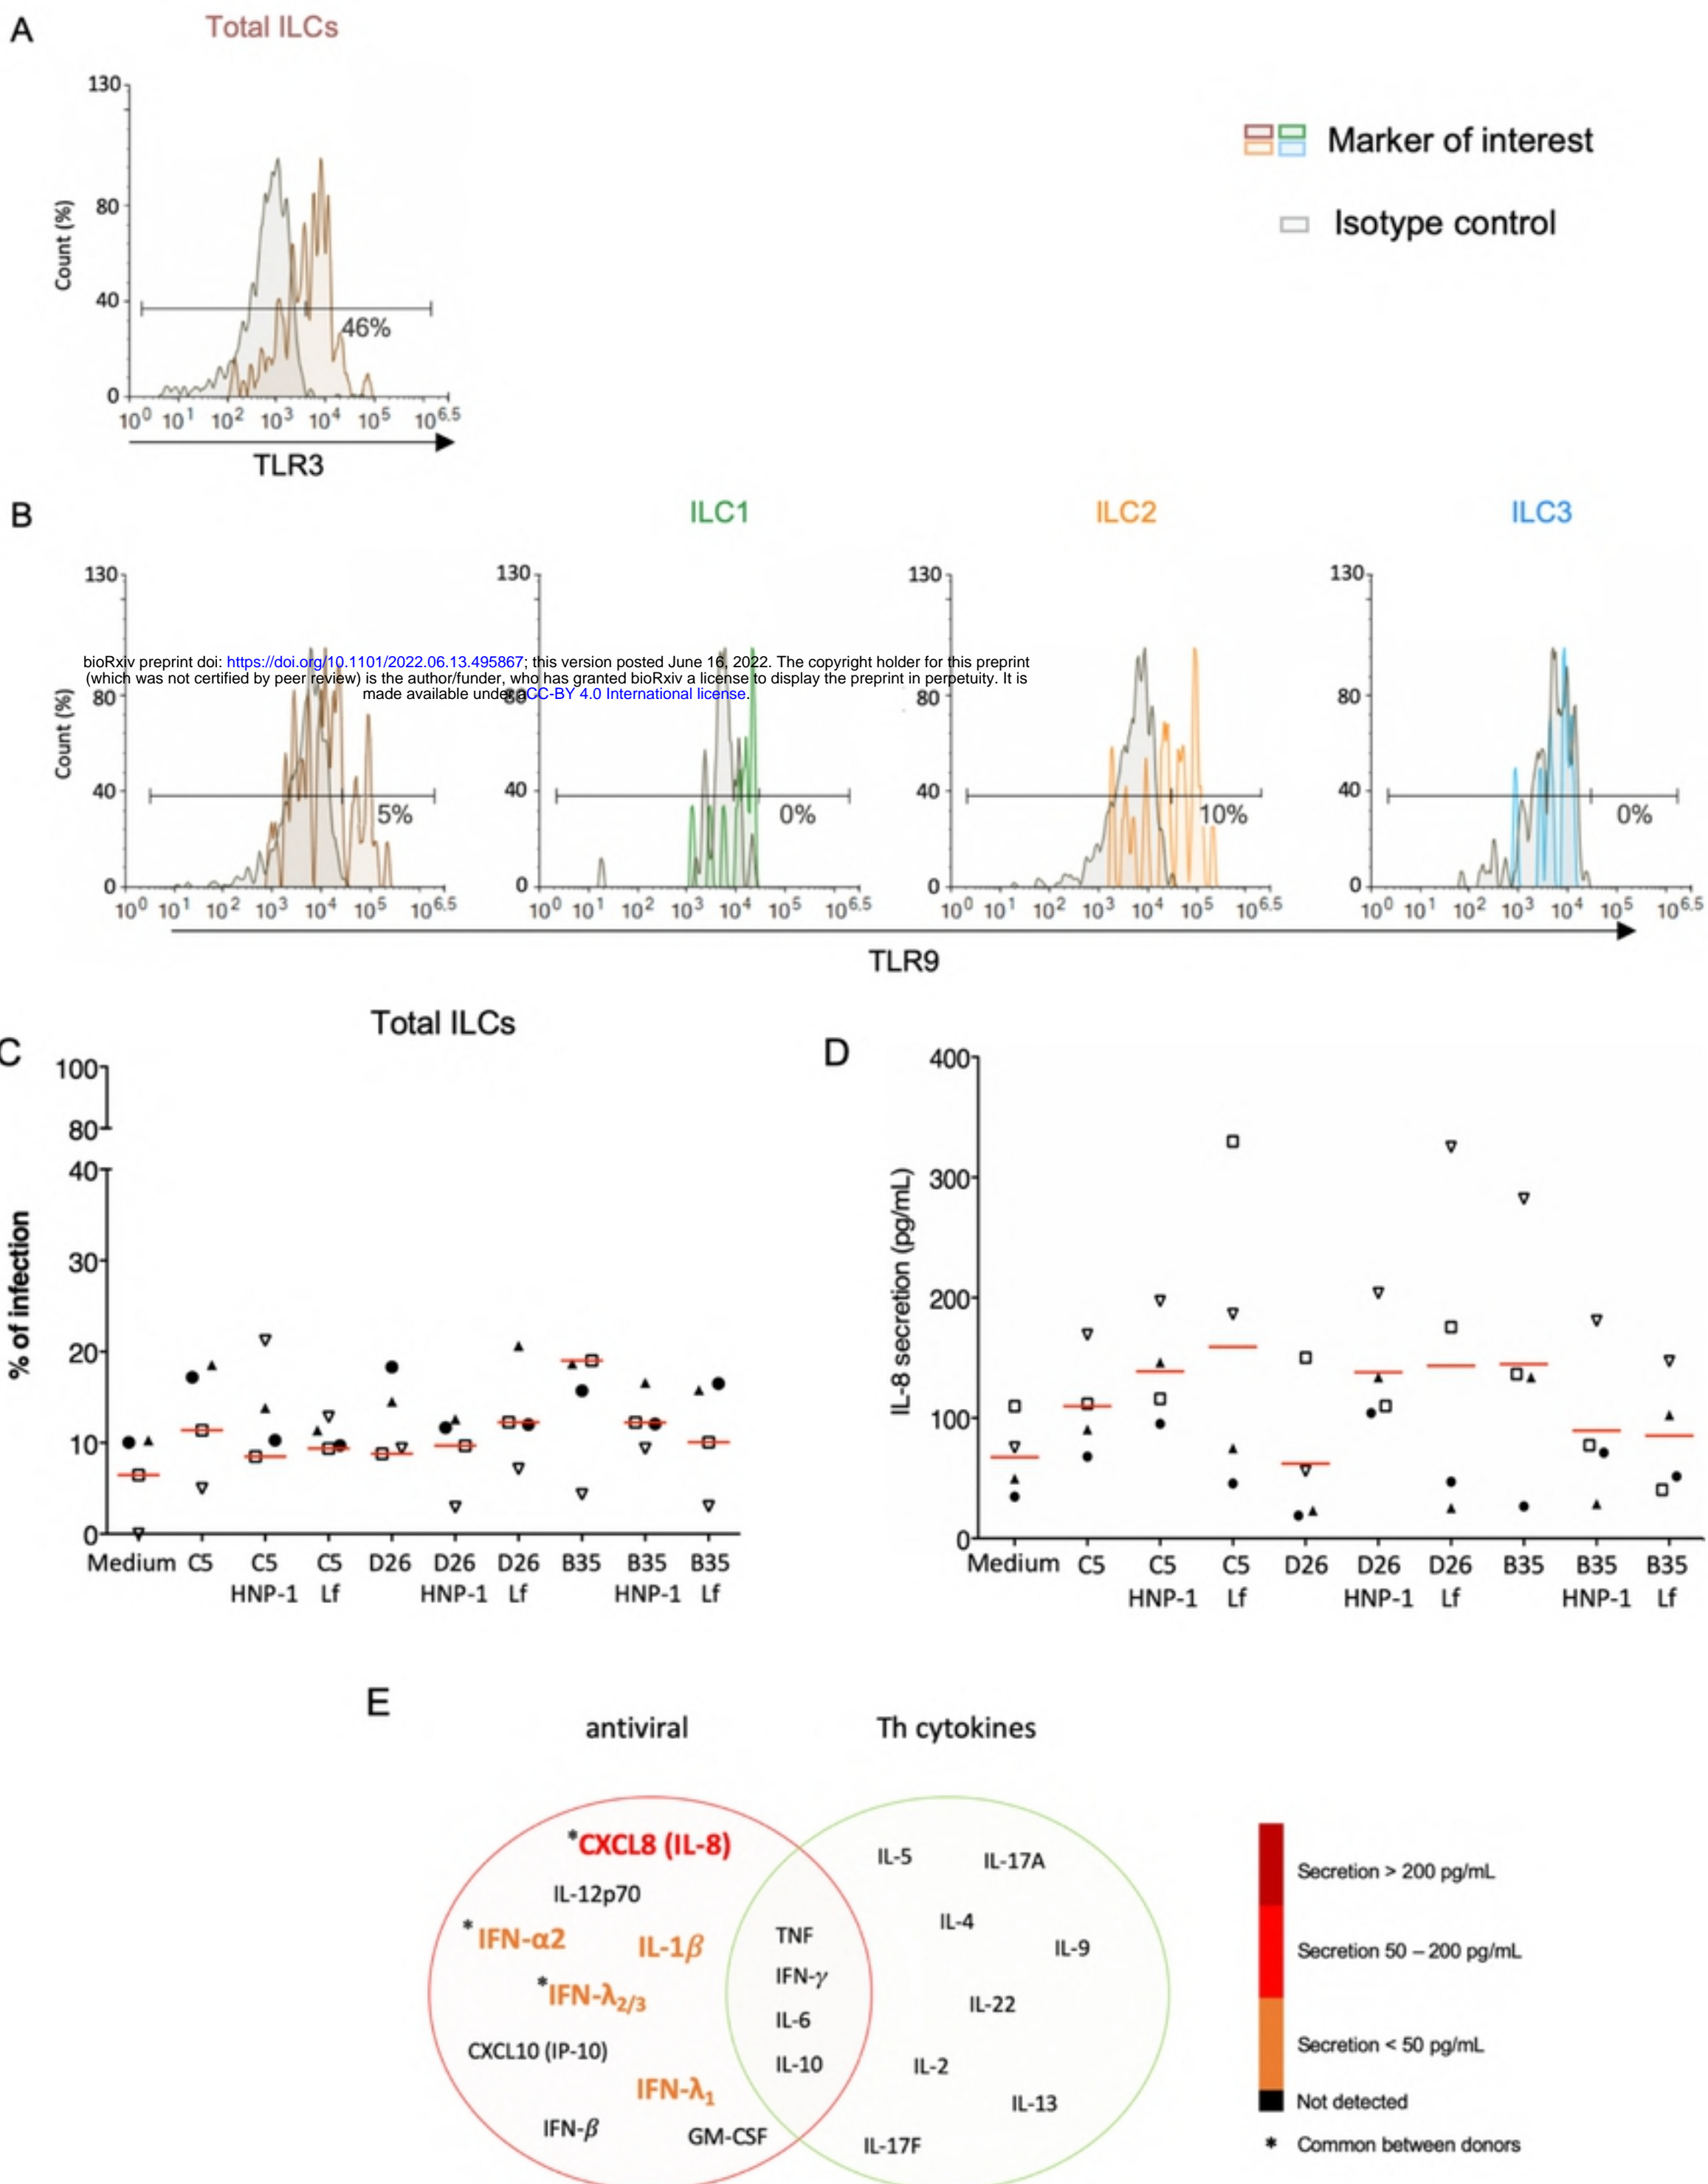

Figure 7

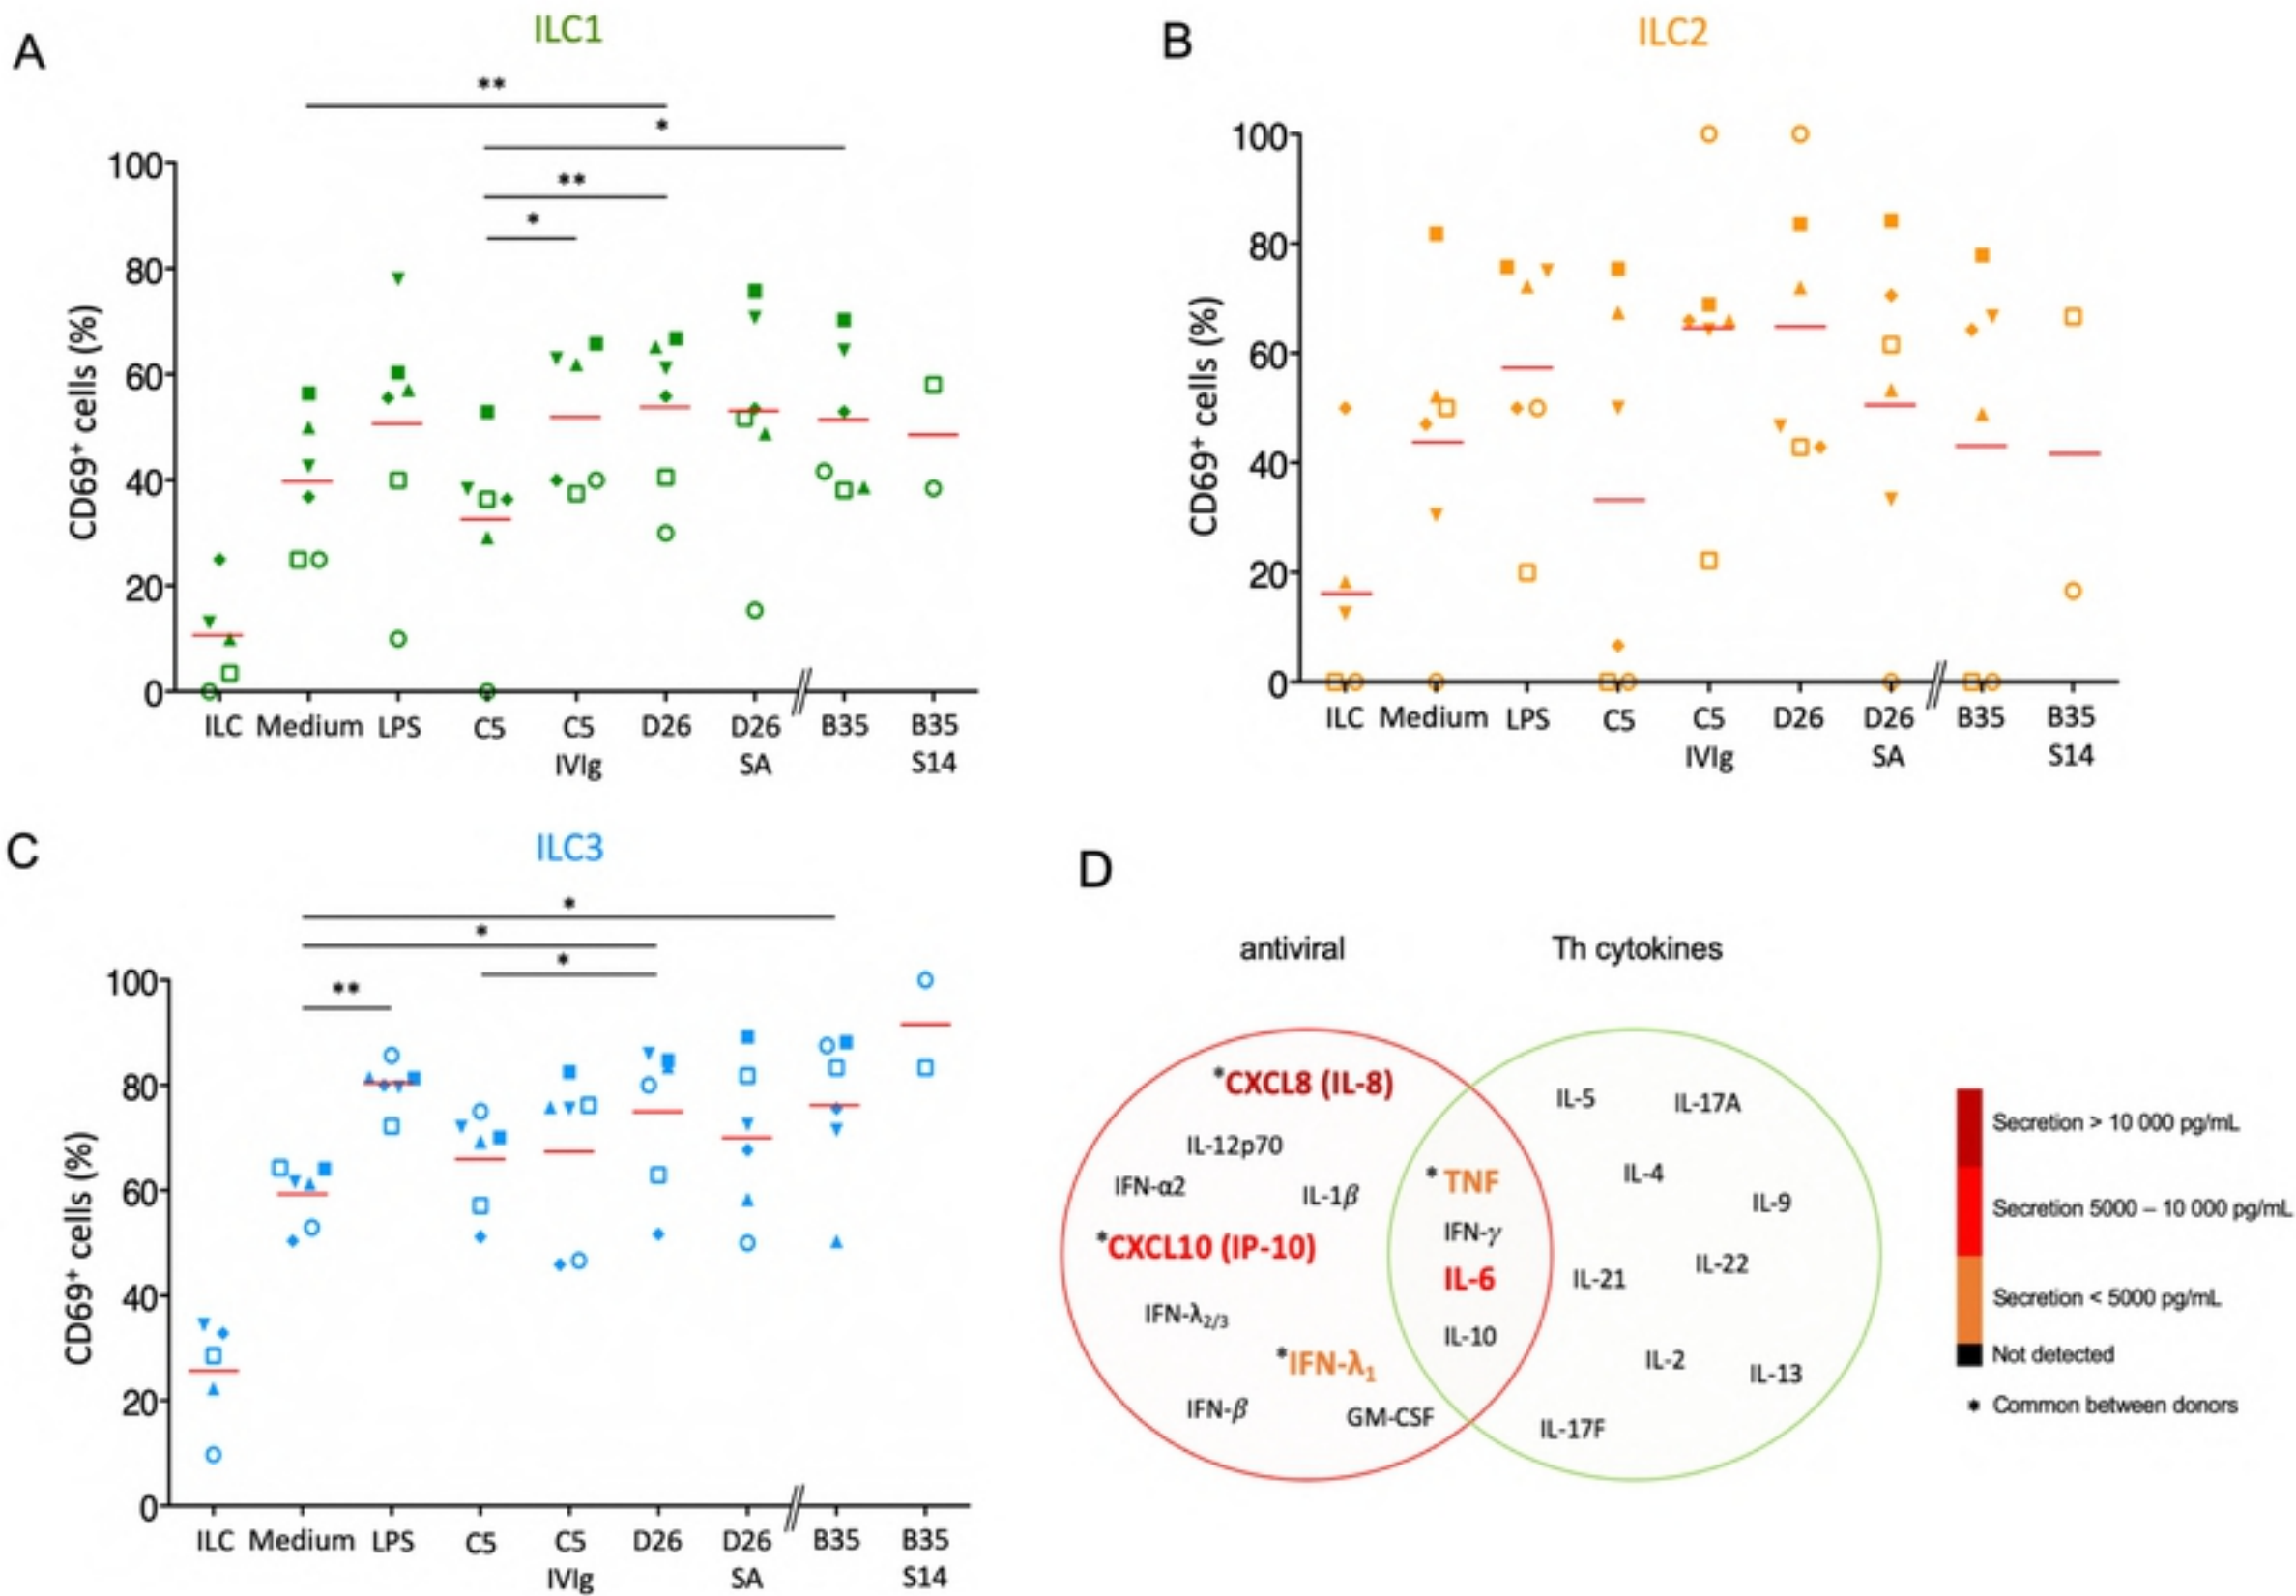

Figure 8
